# Supplementary material for: The Heck reaction of allylic alcohols catalysed by an N-heterocyclic carbene-Pd(ii) complex and toxicity of the ligand precursor for the marine benthic copepod Amphiascoides atopus
Source: Royal Society of Chemistry journal article supplement (doi:10.1039/d1ra03484g), 2021-01-01
Supplement: d1ra03484g1.pdf [file d1ra03484g1.pdf]

## Supporting Information

### **The Heck reaction of allylic alcohols catalysed by an N-heterocyclic carbene-Pd(II) complex and toxicity of the ligand precursor for the marine benthic copepod *Amphiascoides atopus***

Jorge Cárdenas,<sup>a</sup> Rubén Gaviño,<sup>a</sup> Eréndira García-Ríos,<sup>a</sup> Lucero Rios-Ruiz,<sup>a</sup> Ana C. Puello-Cruz,<sup>b</sup> Francisco Neptalí Morales-Serna,\*<sup>c</sup> Samuel Gómez,<sup>c</sup> Adolfo López-Torres,<sup>d</sup> José Antonio Morales-Serna\*<sup>d</sup>

<sup>a</sup>*Instituto de Química, Universidad Nacional Autónoma de México, Circuito Exterior, Ciudad Universitaria, Ciudad de México, 04510, México.*

<sup>b</sup>*Instituto de Ciencias del Mar y Limnología, Universidad Nacional Autónoma de México, Mazatlán, Sinaloa, 82040, México.*

<sup>c</sup>*Centro de Investigación en Alimentación y Desarrollo, A.C. Unidad Mazatlán en Acuicultura y Manejo Ambiental, Mazatlán, Sinaloa, 82112, México.*

<sup>d</sup>*Instituto de Química Aplicada, Universidad del Papaloapan, Tuxtepec, Oaxaca, 68301, México. E-mail: joseantonio.moralesserna@gmail.com*

### **Table of Contents**

1. NMR spectra

S1

# Supporting Information

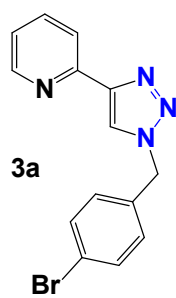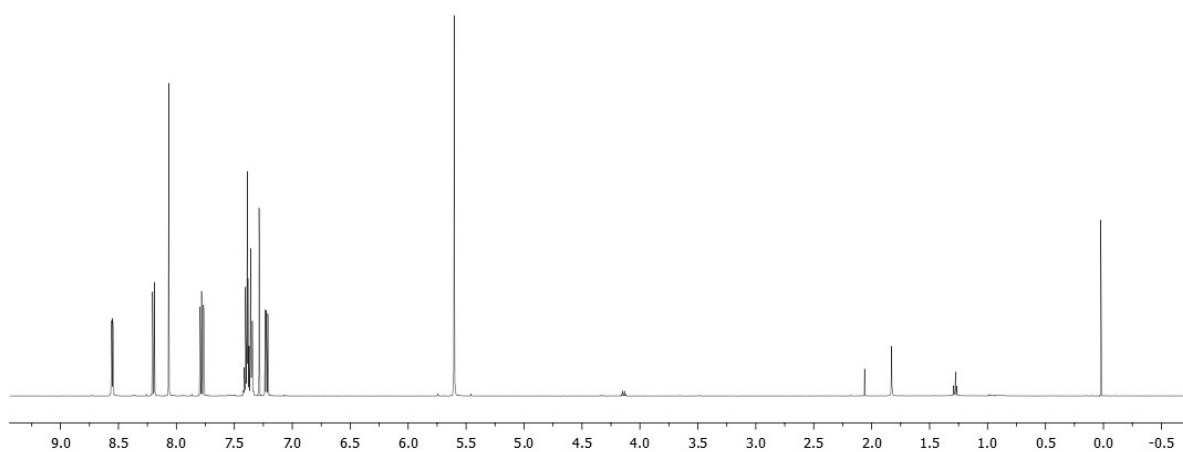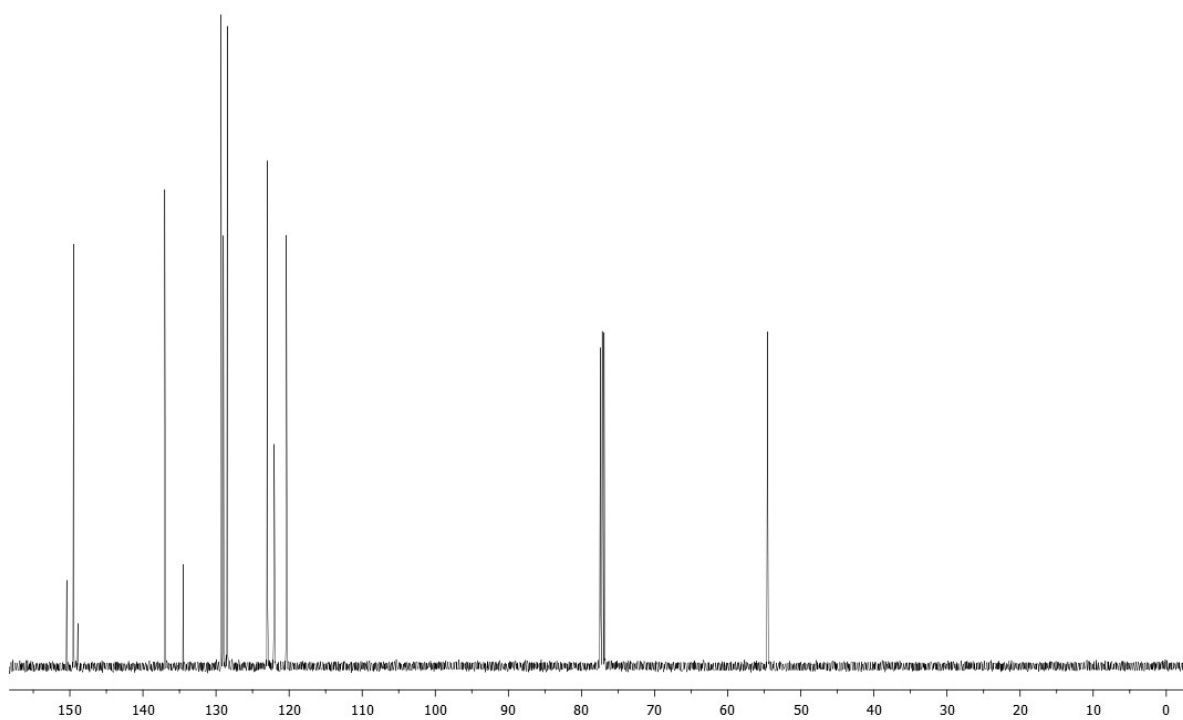

S1.  $^1\text{H}$  NMR and  $^{13}\text{C}$  NMR in  $\text{CDCl}_3$  of **3a**

## Supporting Information

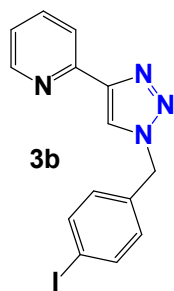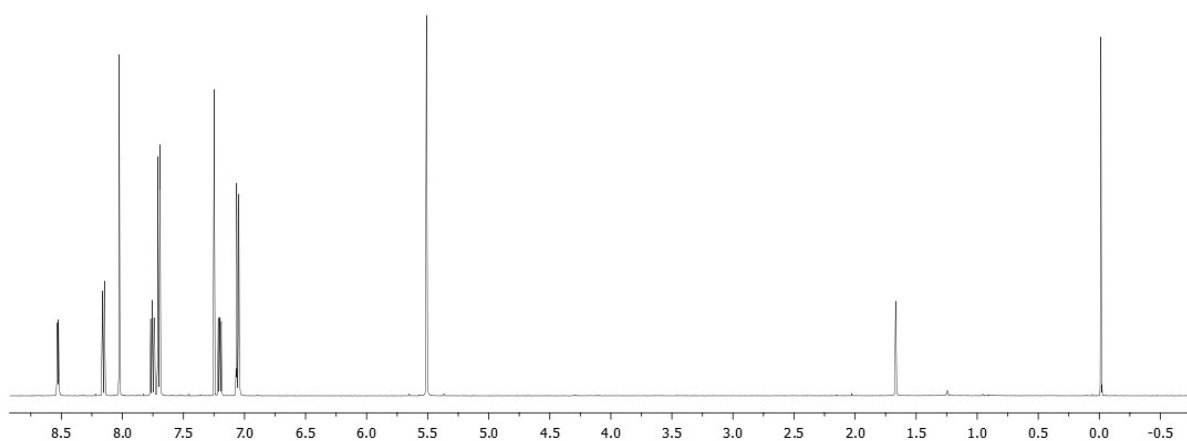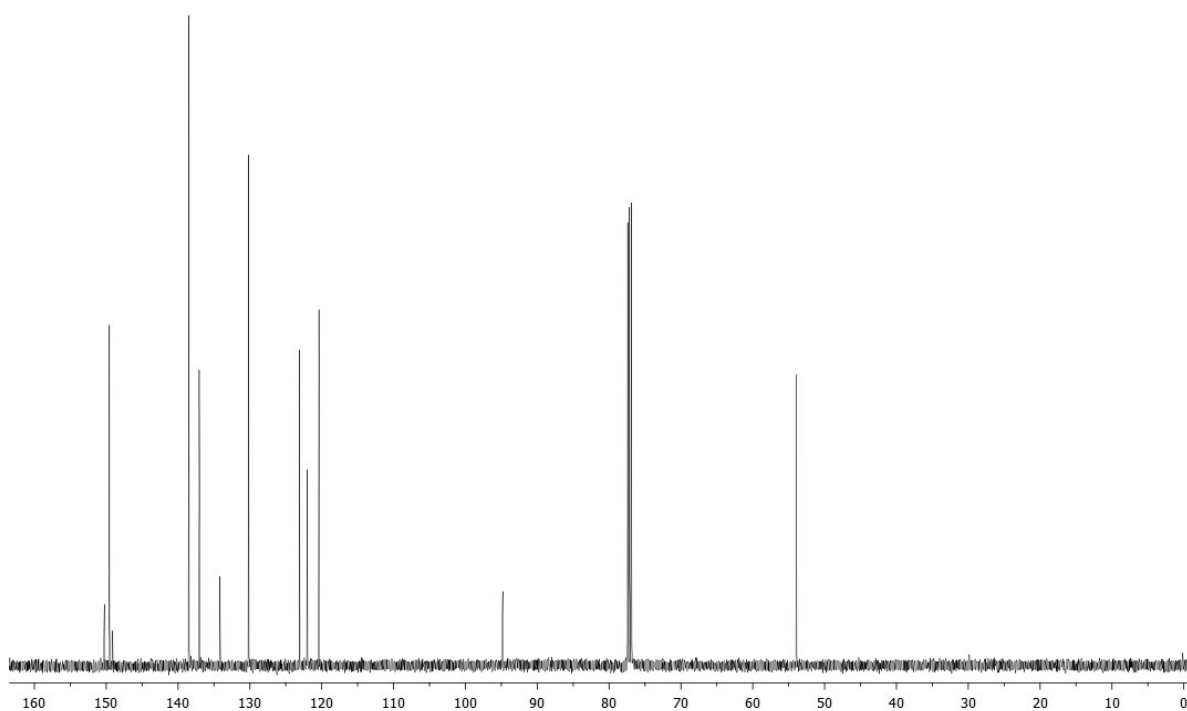

S2. <sup>1</sup>H NMR and <sup>13</sup>C NMR in CDCl<sub>3</sub> of **3b**

## Supporting Information

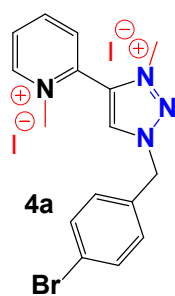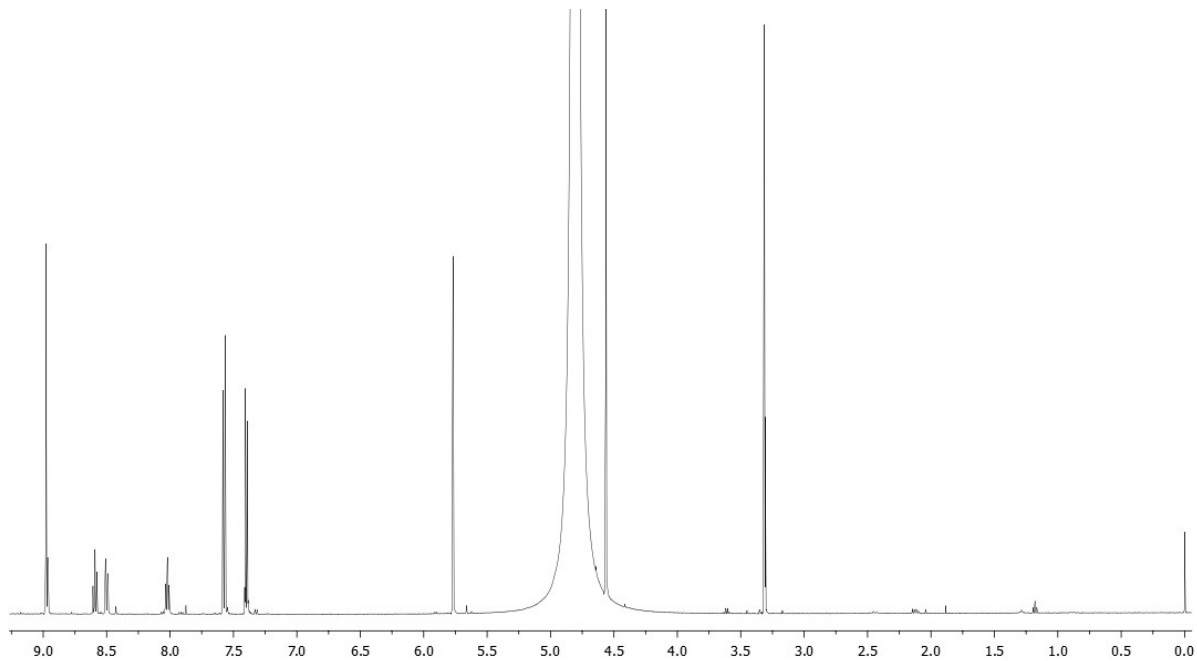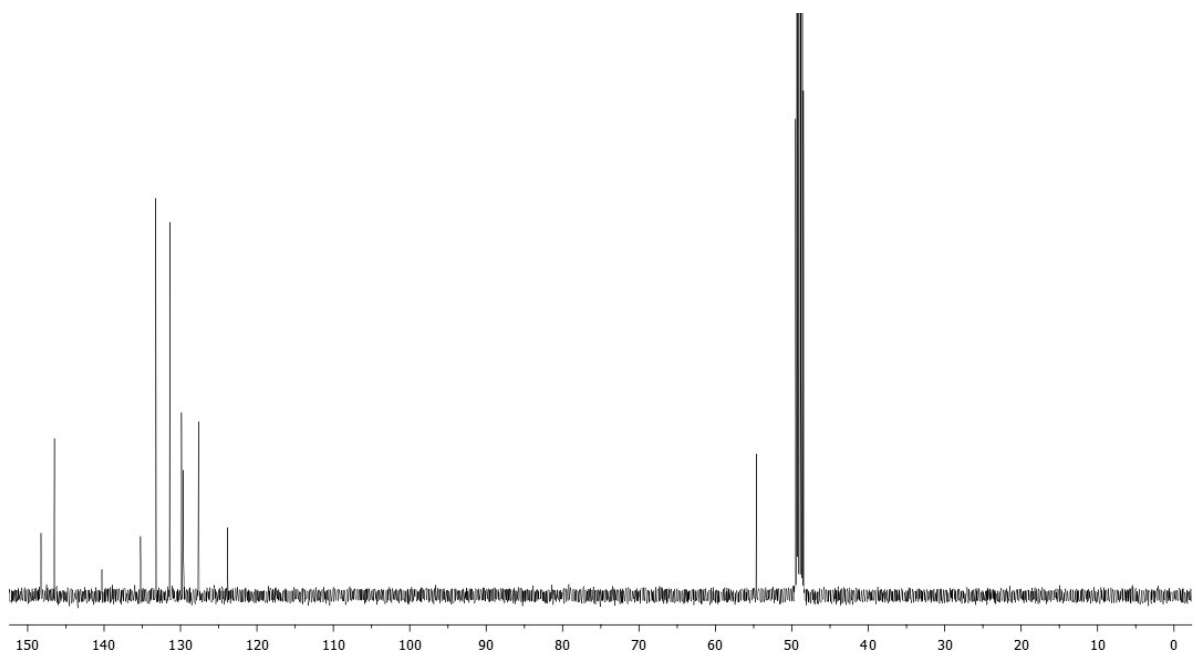

S3. <sup>1</sup>H NMR and <sup>13</sup>C NMR in CDCl<sub>3</sub> of 4a

## Supporting Information

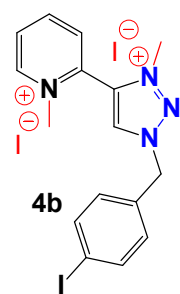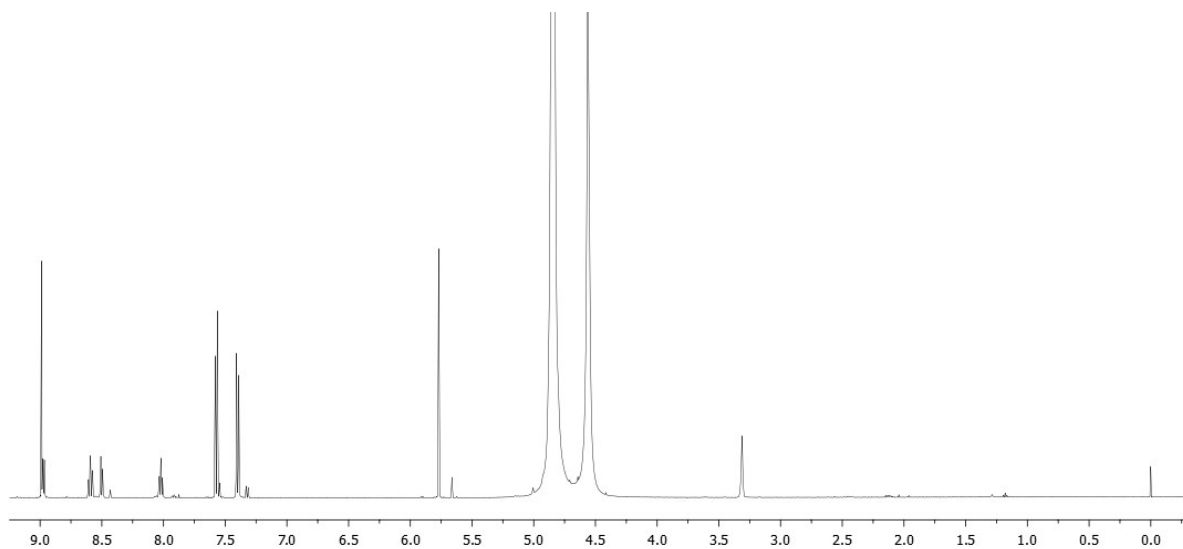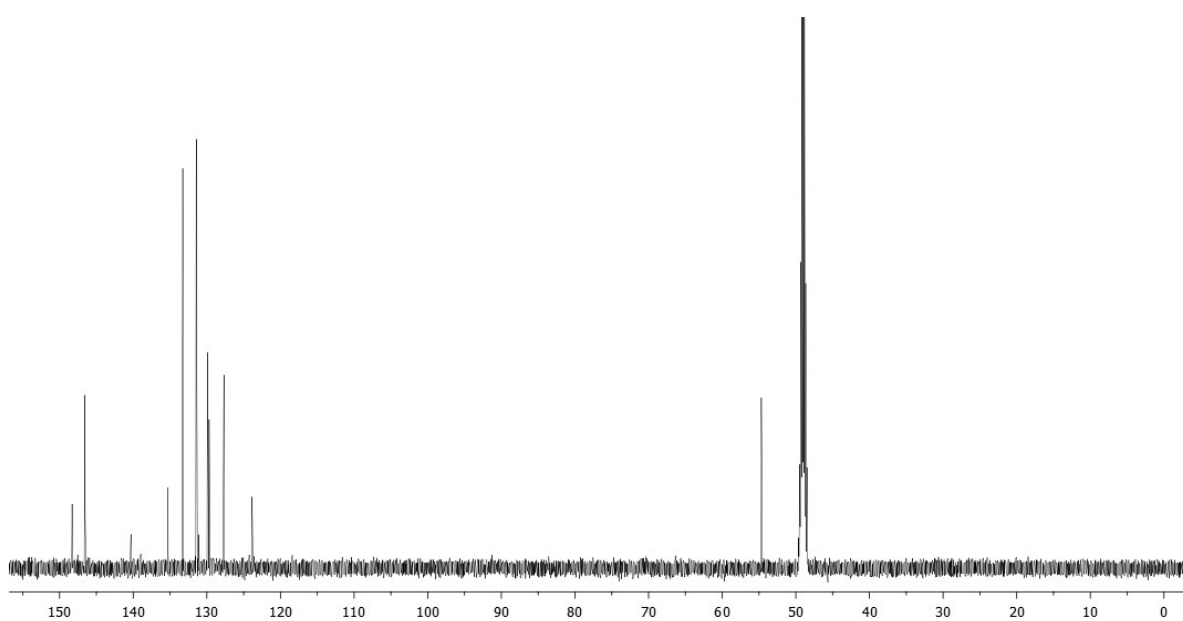

S4. <sup>1</sup>H NMR and <sup>13</sup>C NMR in CDCl<sub>3</sub> of **4b**

## Supporting Information

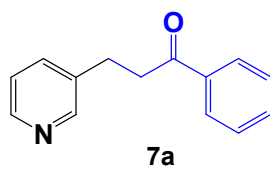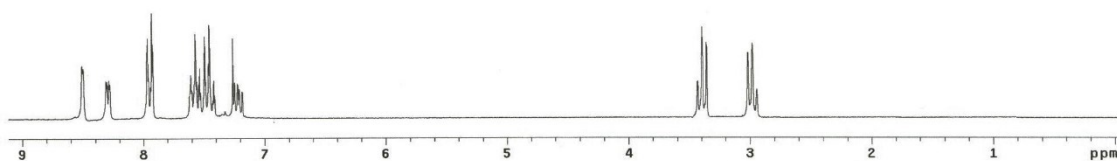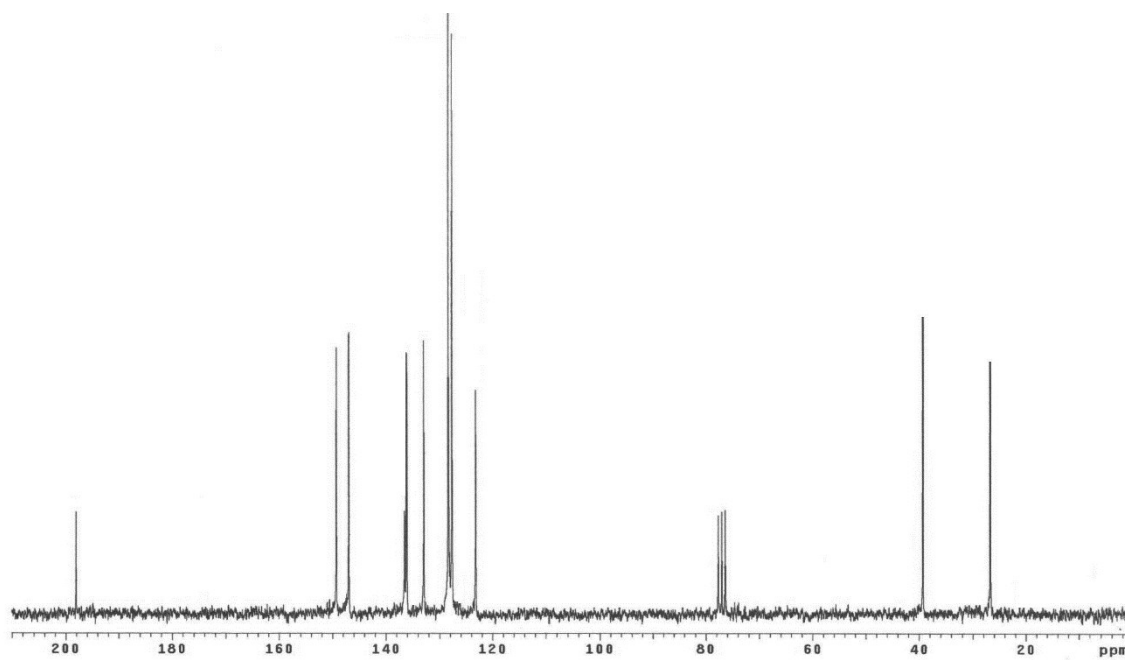

S5.  $^1\text{H}$  NMR and  $^{13}\text{C}$  NMR in  $\text{CDCl}_3$  of **7a**

# Supporting Information

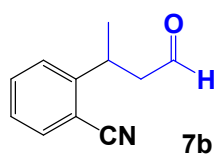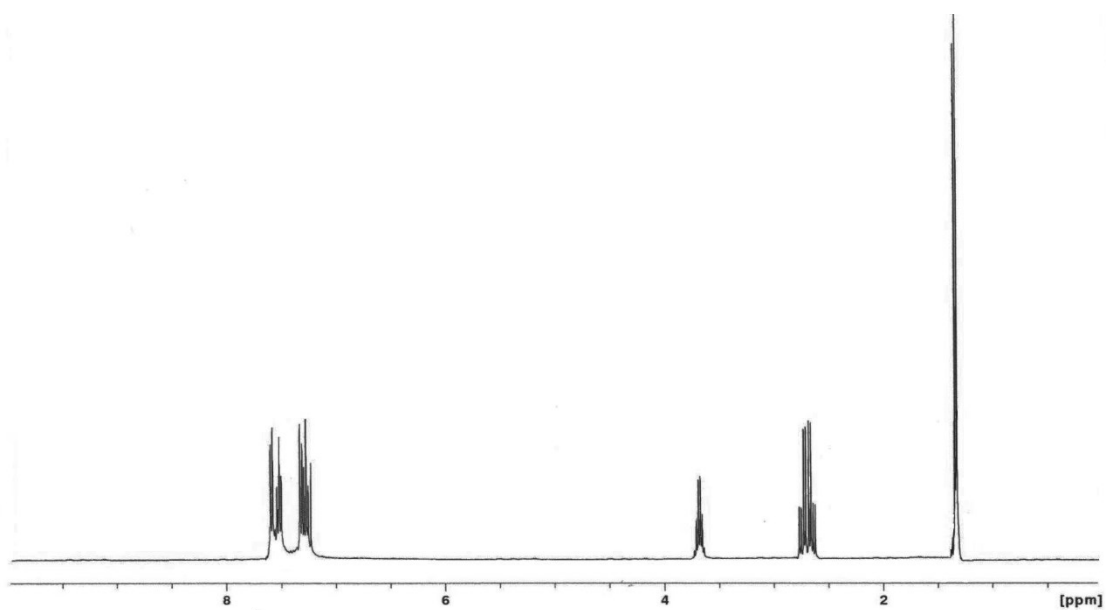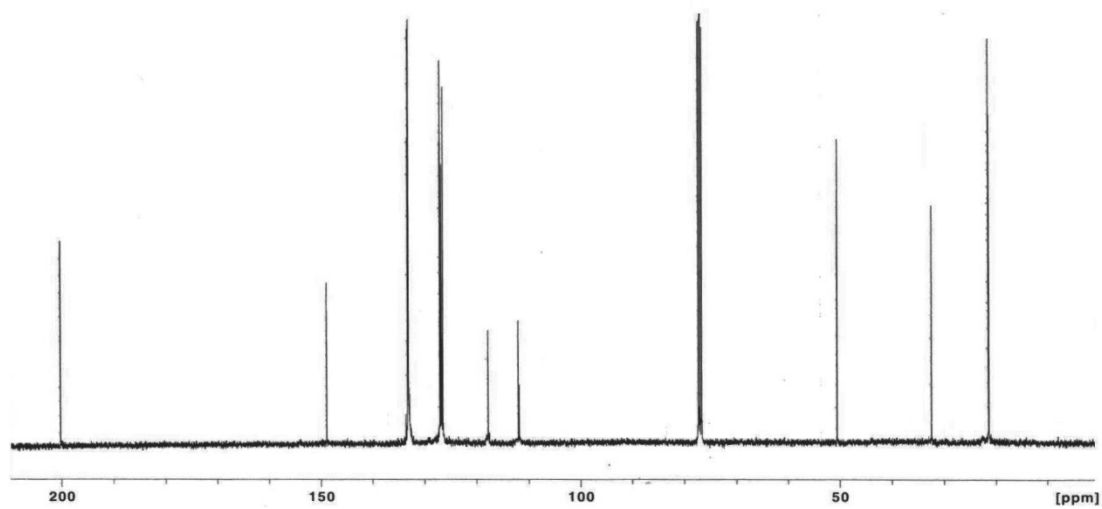

S6.  $^1\text{H}$  NMR and  $^{13}\text{C}$  NMR in  $\text{CDCl}_3$  of **7b**

# Supporting Information

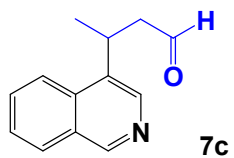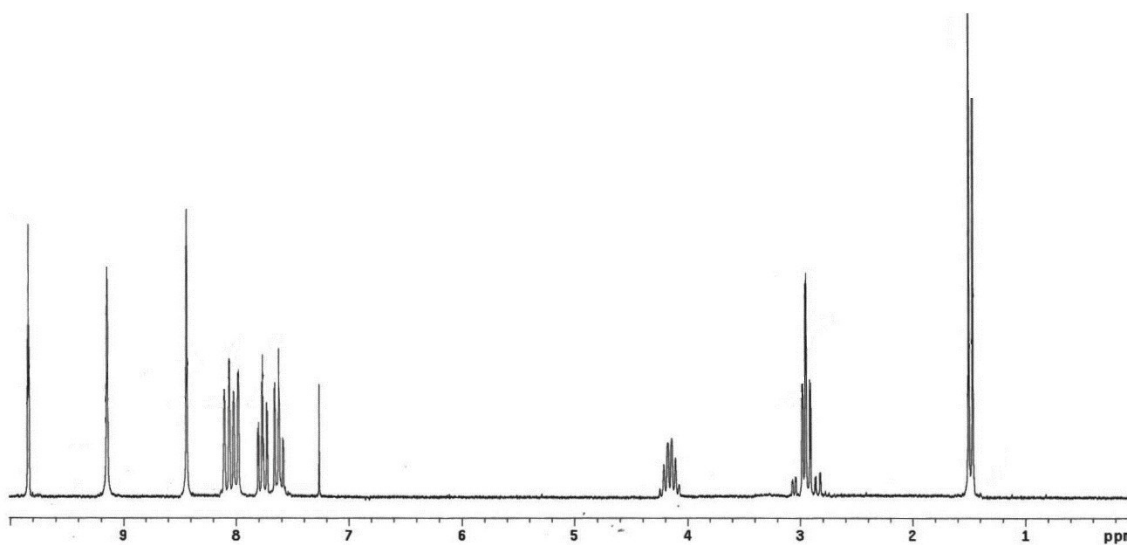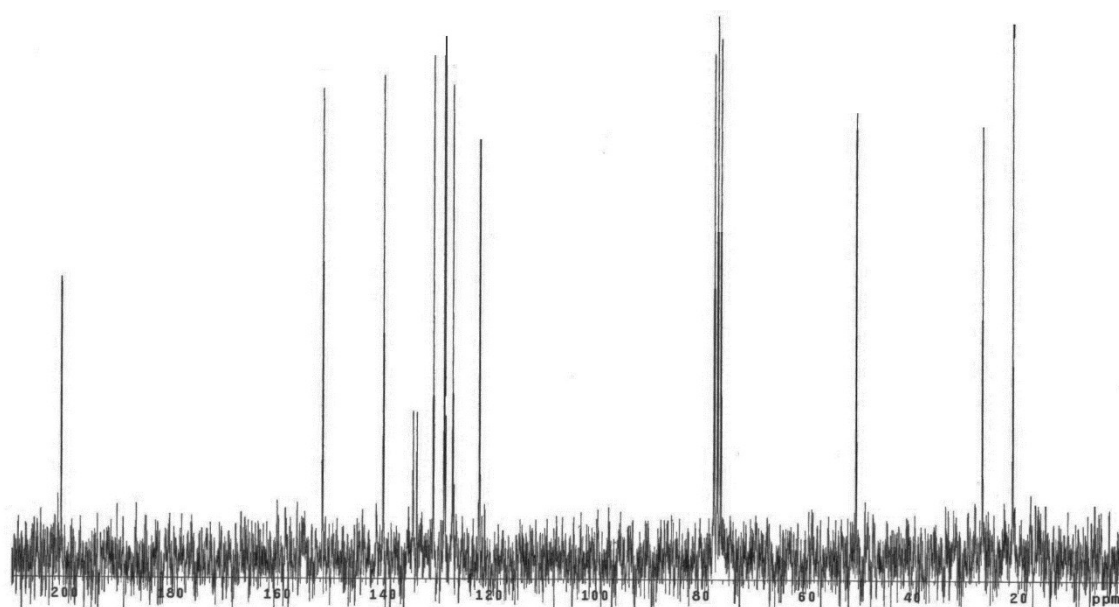

S7.  $^1\text{H}$  NMR and  $^{13}\text{C}$  NMR in  $\text{CDCl}_3$  of **7c**



# Supporting Information

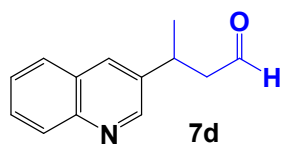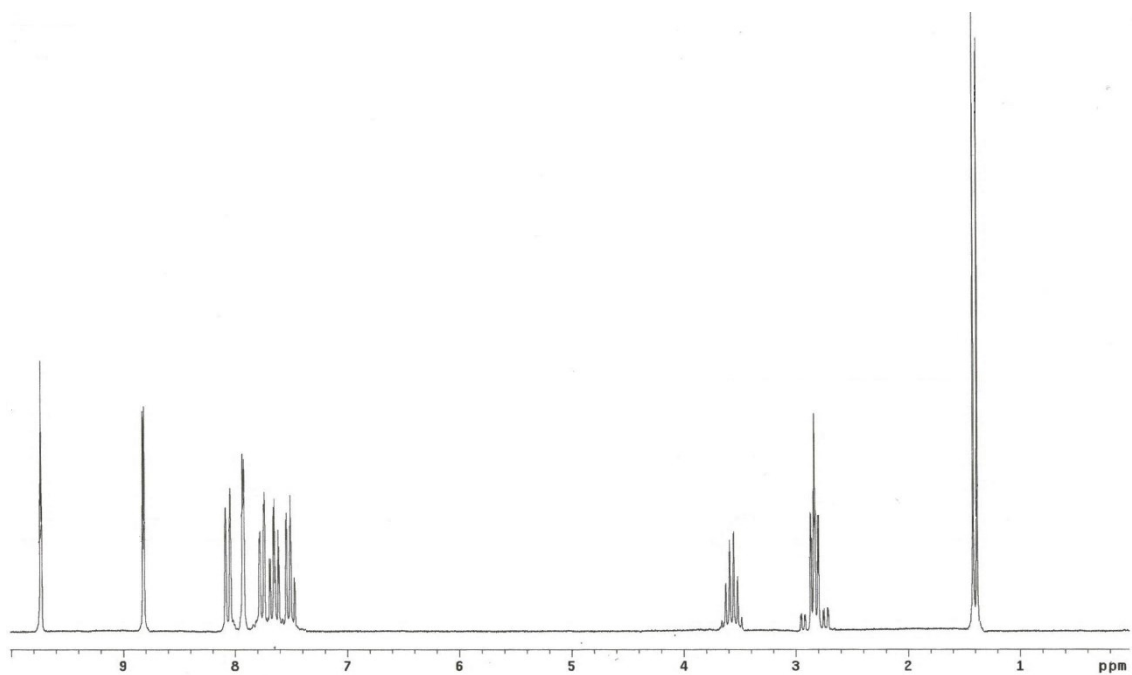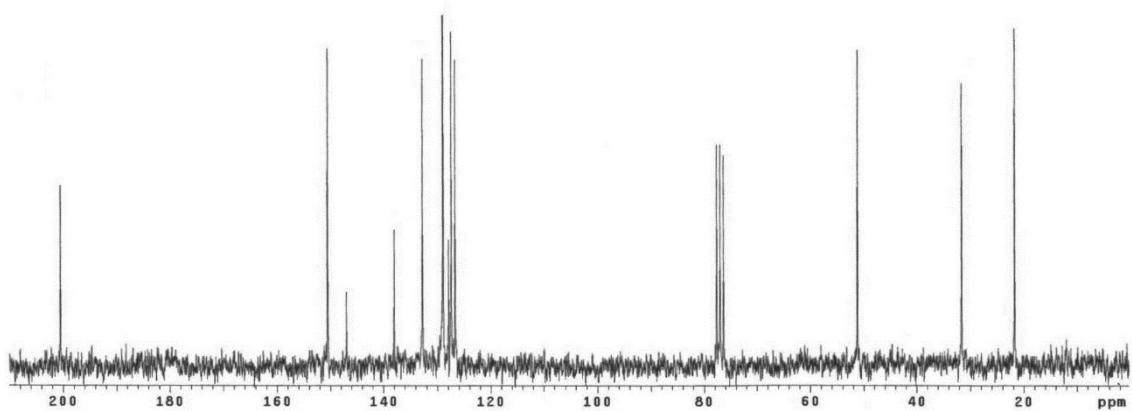

S8.  $^1\text{H}$  NMR and  $^{13}\text{C}$  NMR in  $\text{CDCl}_3$  of **7d**

## Supporting Information

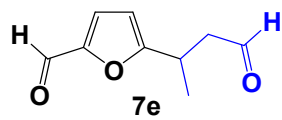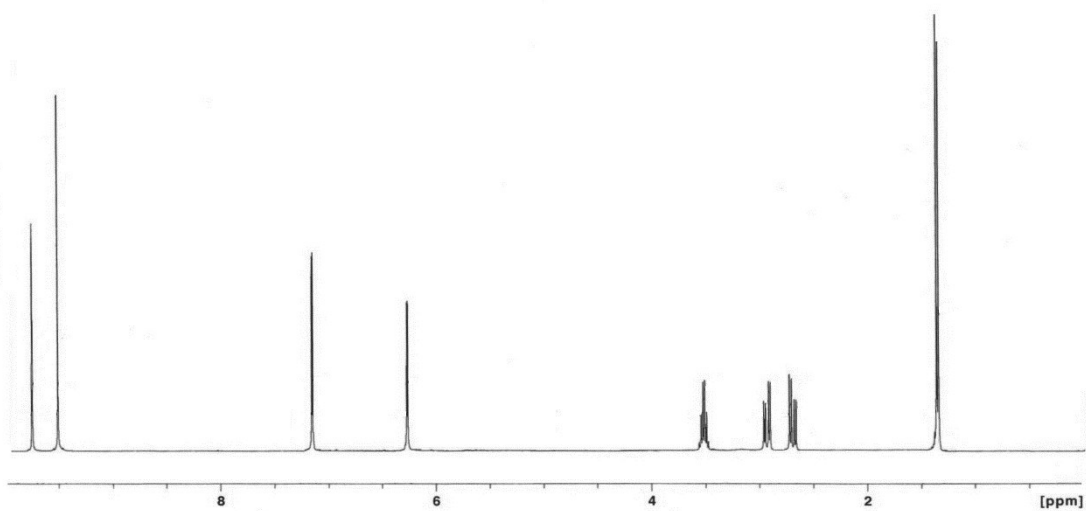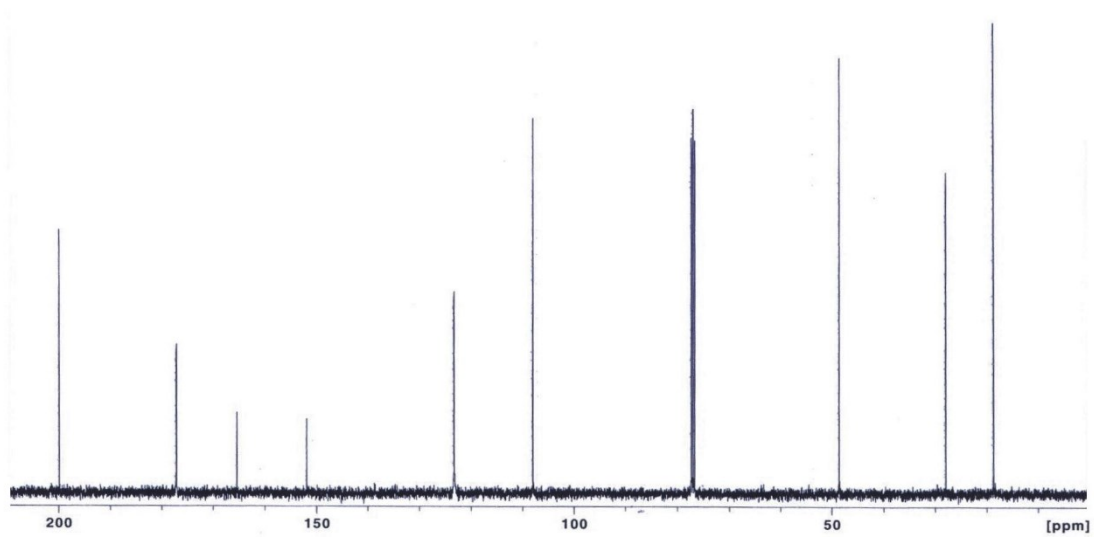

S9. <sup>1</sup>H NMR and <sup>13</sup>C NMR in CDCl<sub>3</sub> of 7e

# Supporting Information

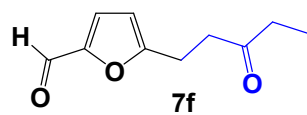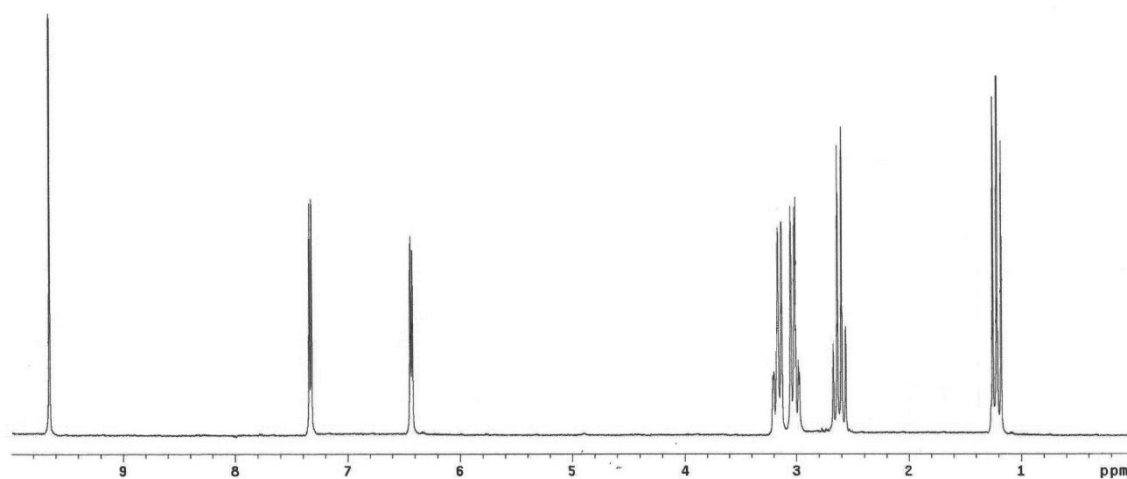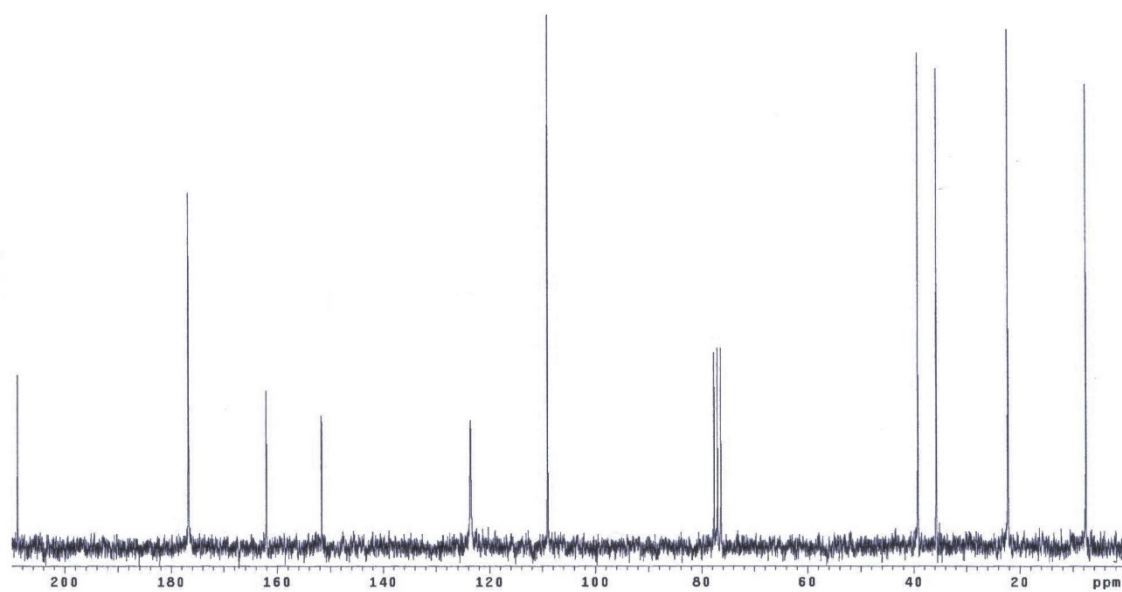

S10.  $^1\text{H}$  NMR and  $^{13}\text{C}$  NMR in  $\text{CDCl}_3$  of **7f**

# Supporting Information

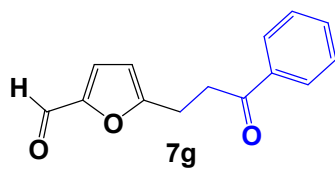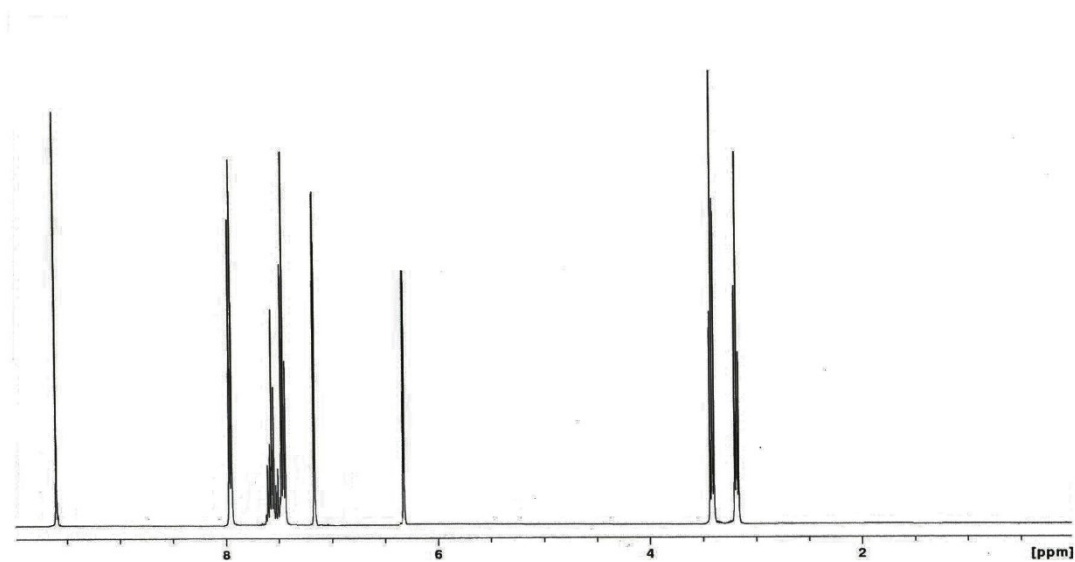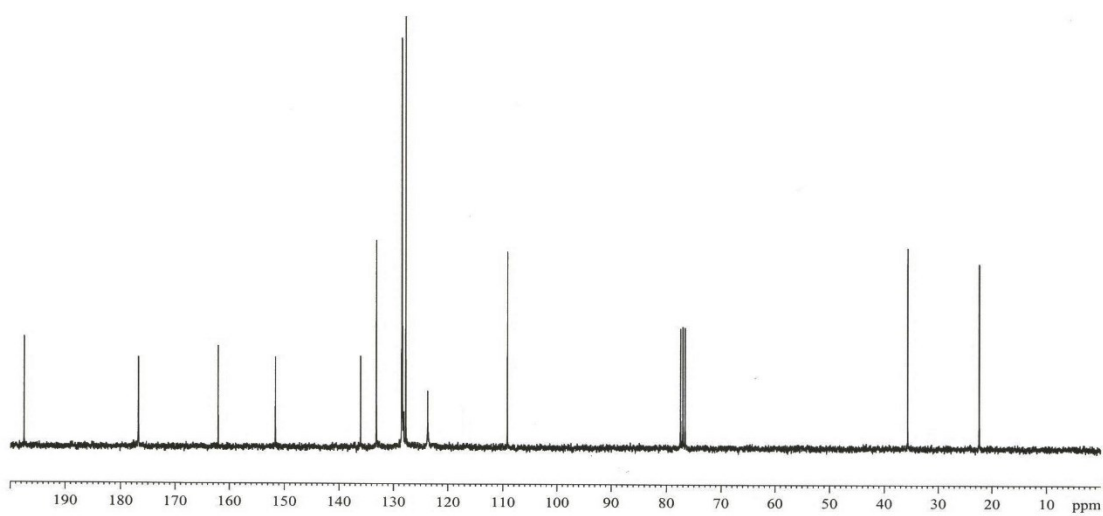

S11.  $^1\text{H}$  NMR and  $^{13}\text{C}$  NMR in  $\text{CDCl}_3$  of **7g**

## Supporting Information

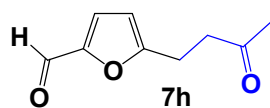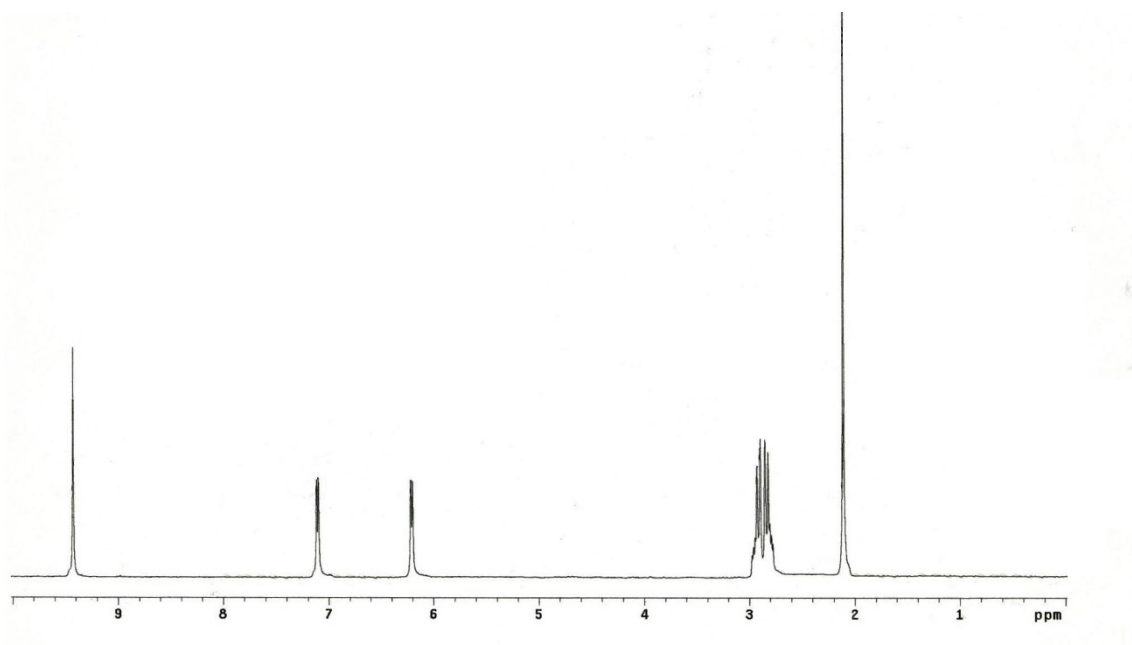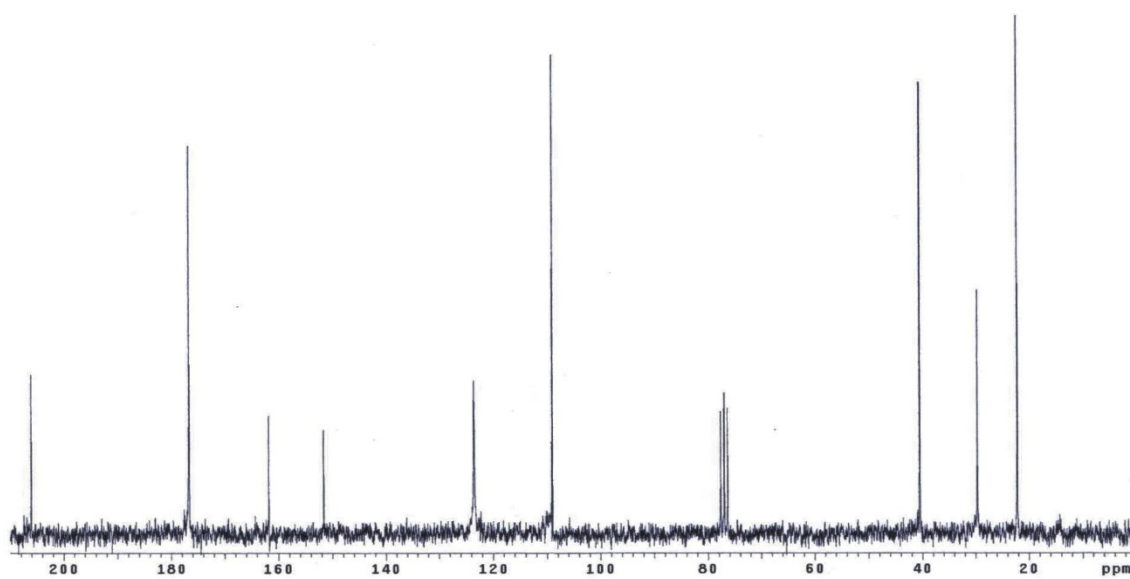

S12.  $^1\text{H}$  NMR and  $^{13}\text{C}$  NMR in  $\text{CDCl}_3$  of **7h**

# Supporting Information

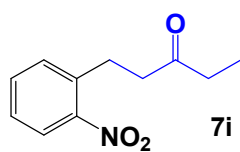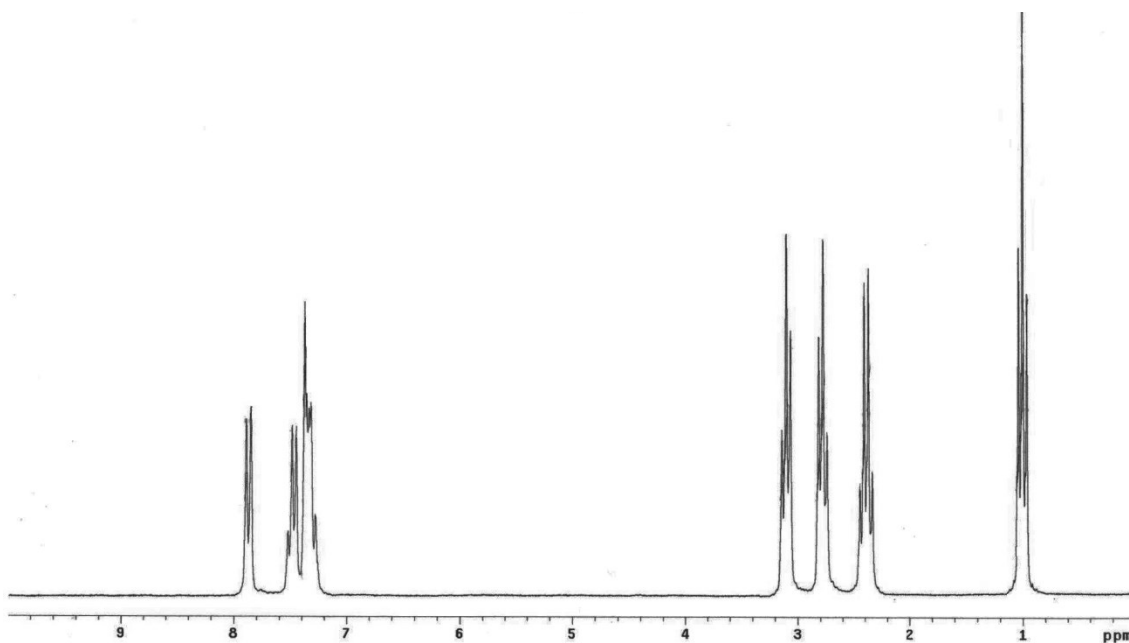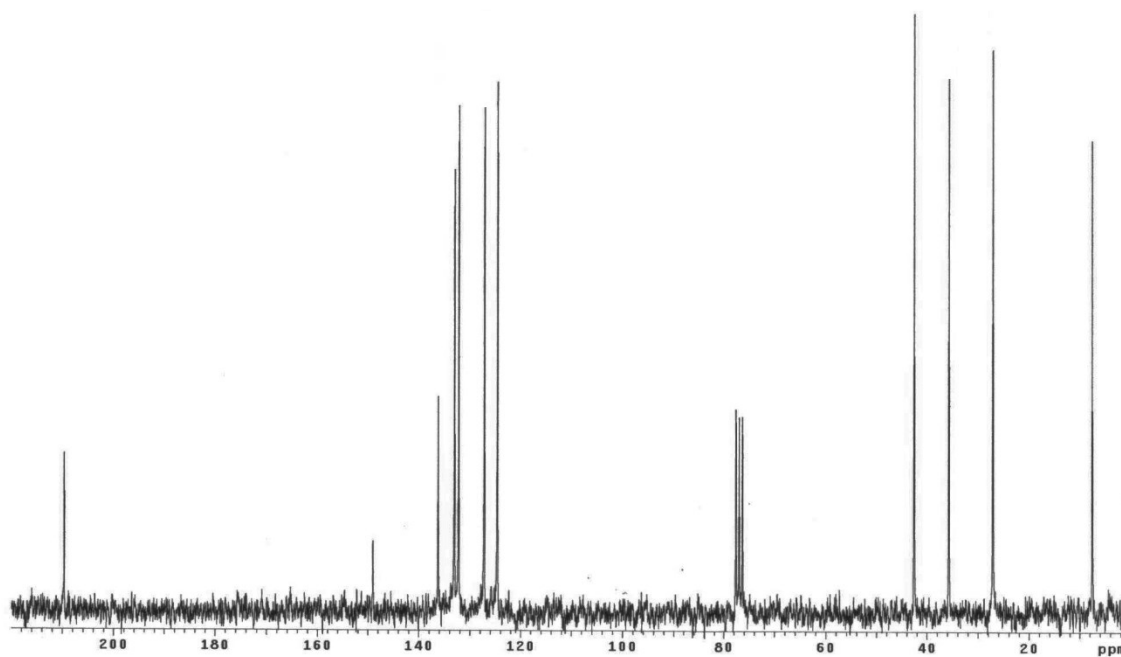

S13.  $^1\text{H NMR}$  and  $^{13}\text{C NMR}$  in  $\text{CDCl}_3$  of **7i**

# Supporting Information

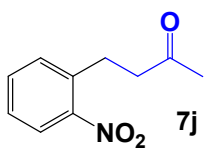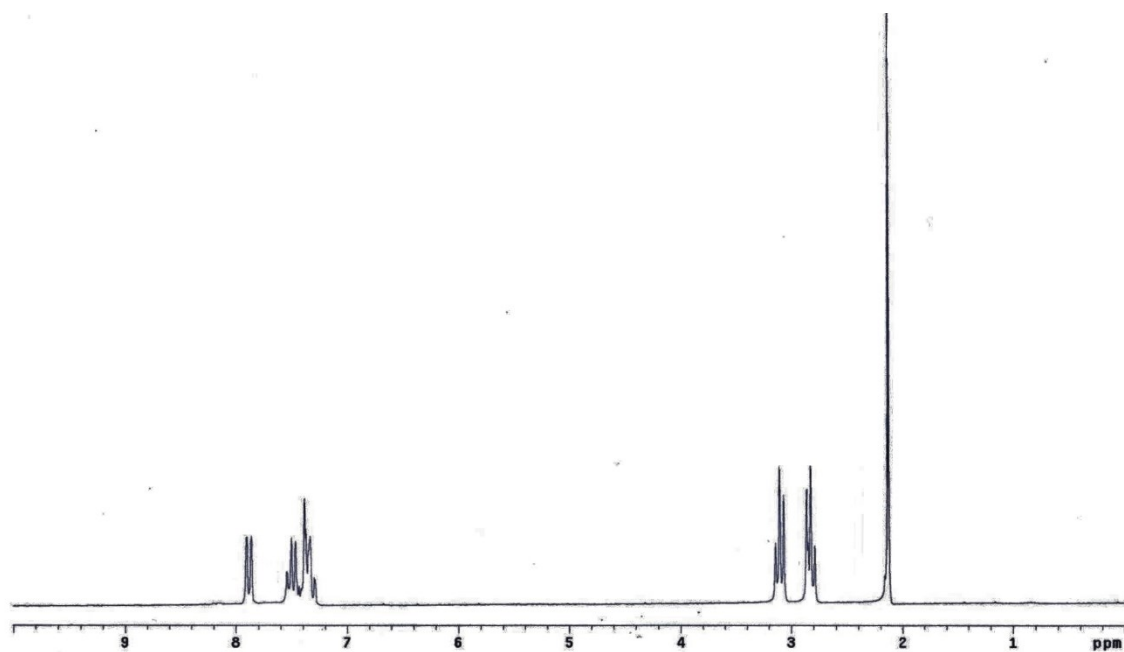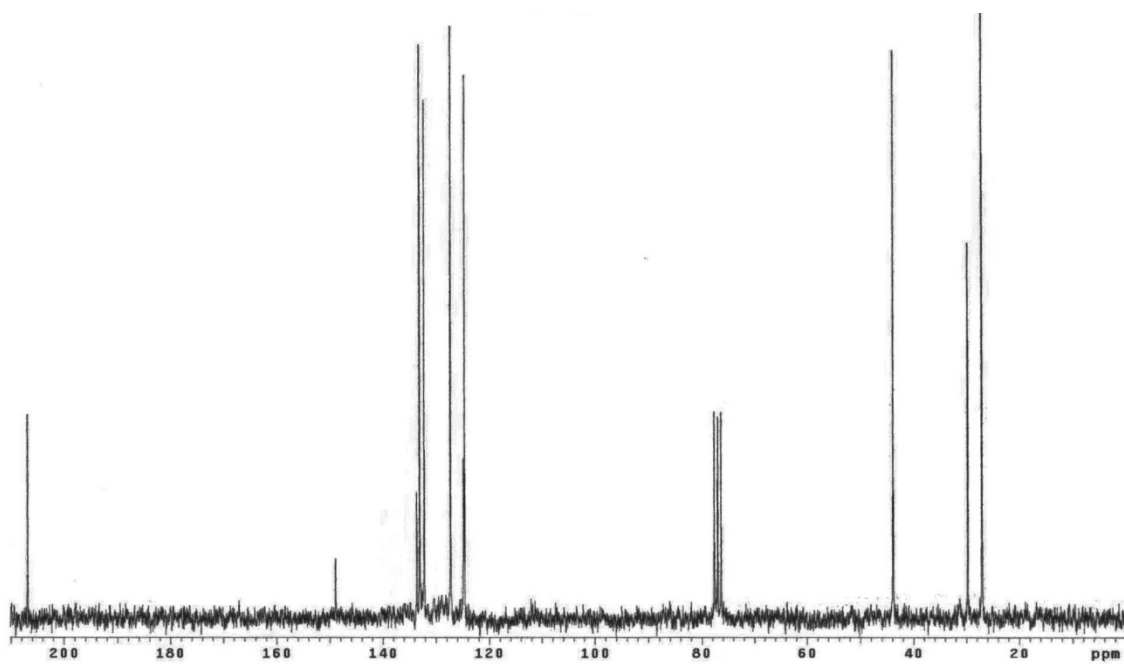

S14.  $^1\text{H}$  NMR and  $^{13}\text{C}$  NMR in  $\text{CDCl}_3$  of **7j**

# Supporting Information

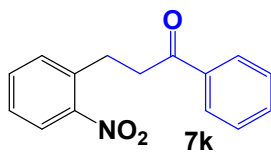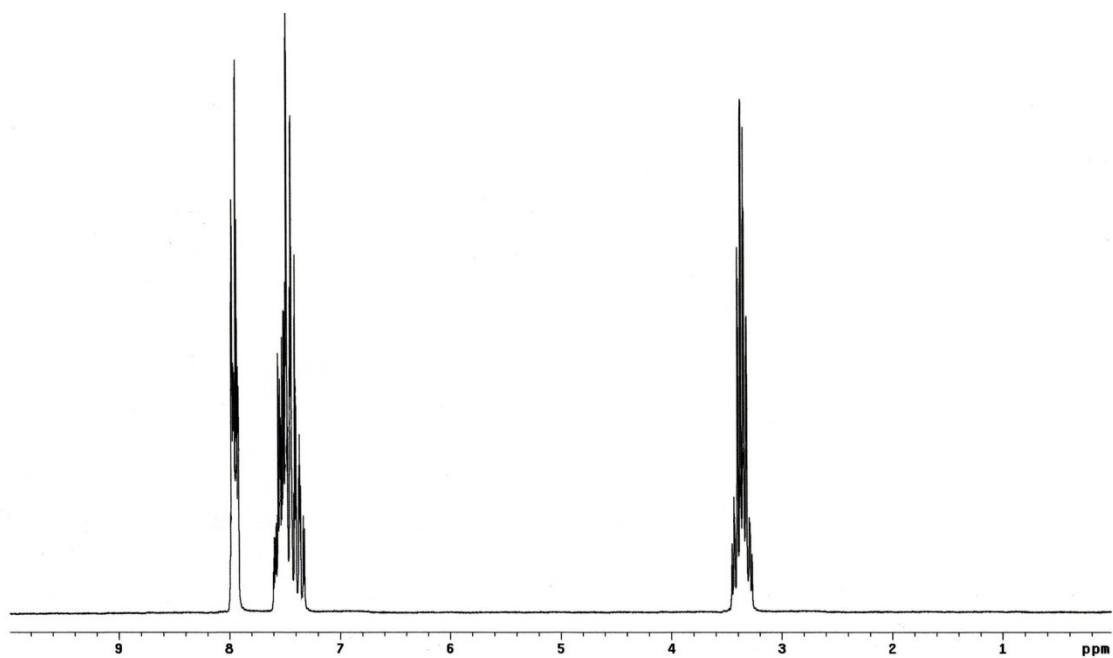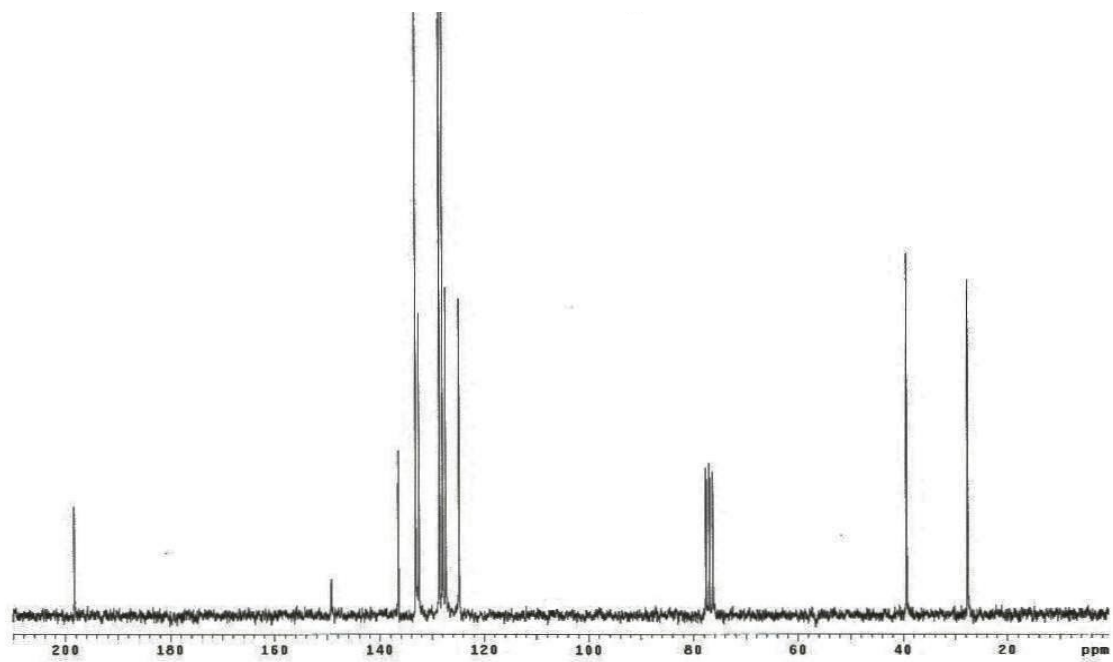

S15.  $^1\text{H}$  NMR and  $^{13}\text{C}$  NMR in  $\text{CDCl}_3$  of **7k**



# Supporting Information

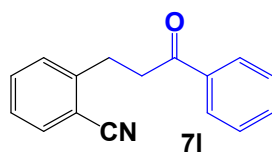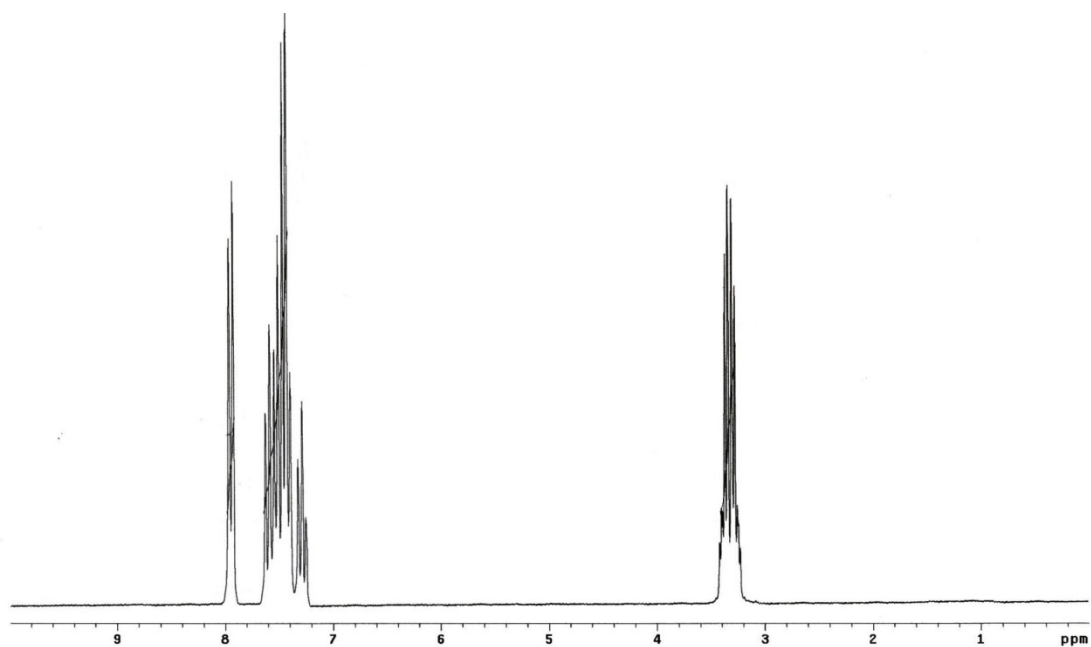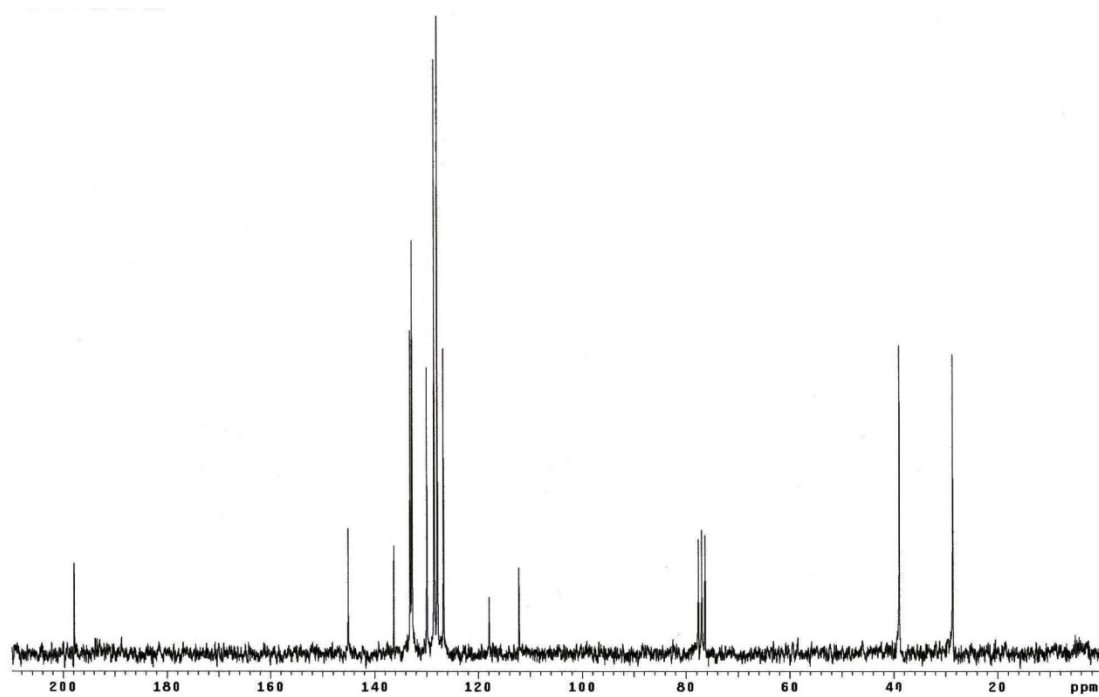

S16.  $^1\text{H}$  NMR and  $^{13}\text{C}$  NMR in  $\text{CDCl}_3$  of **71**

# Supporting Information

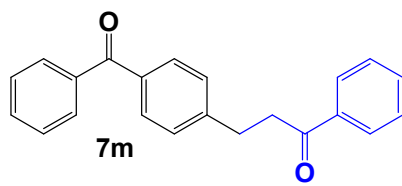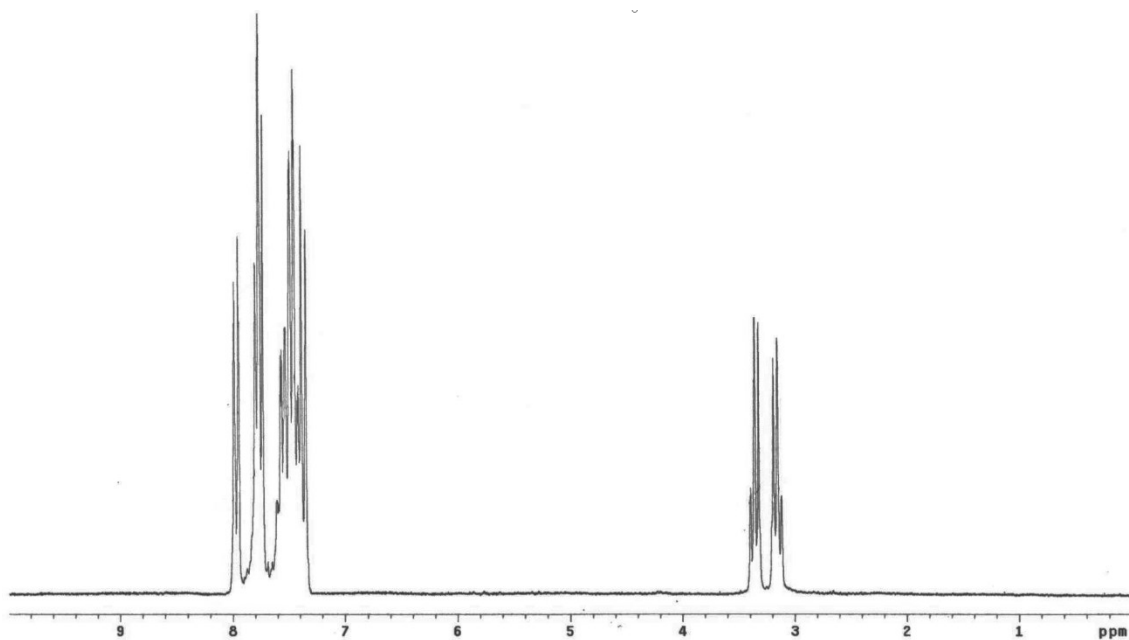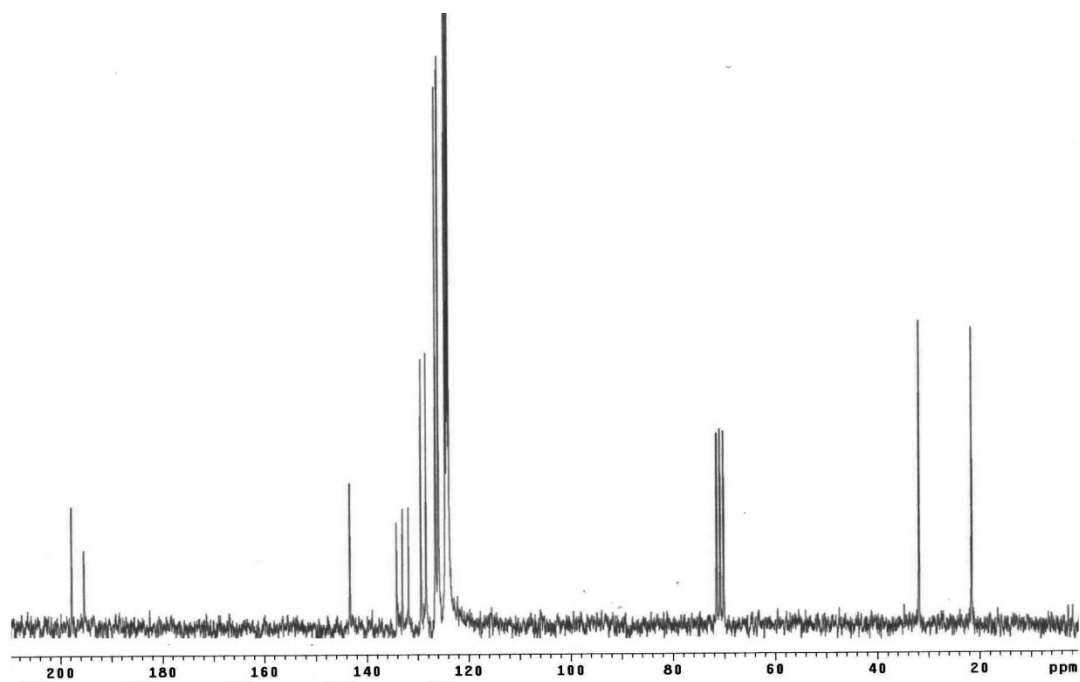

S17.  $^1\text{H}$  NMR and  $^{13}\text{C}$  NMR in  $\text{CDCl}_3$  of **7m**

## Supporting Information

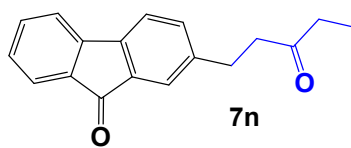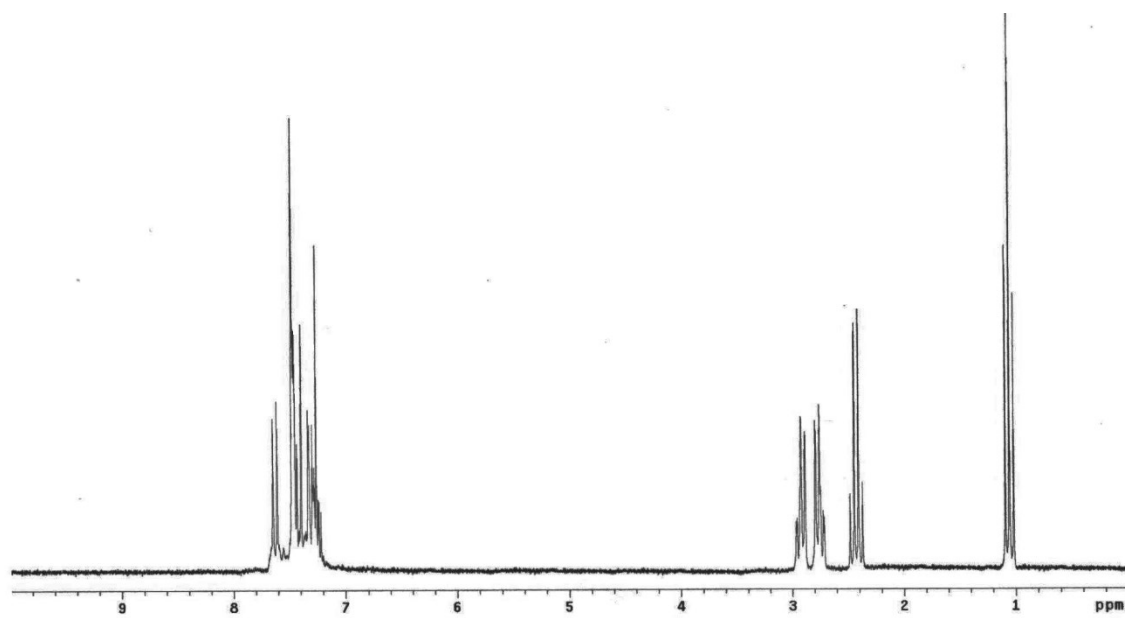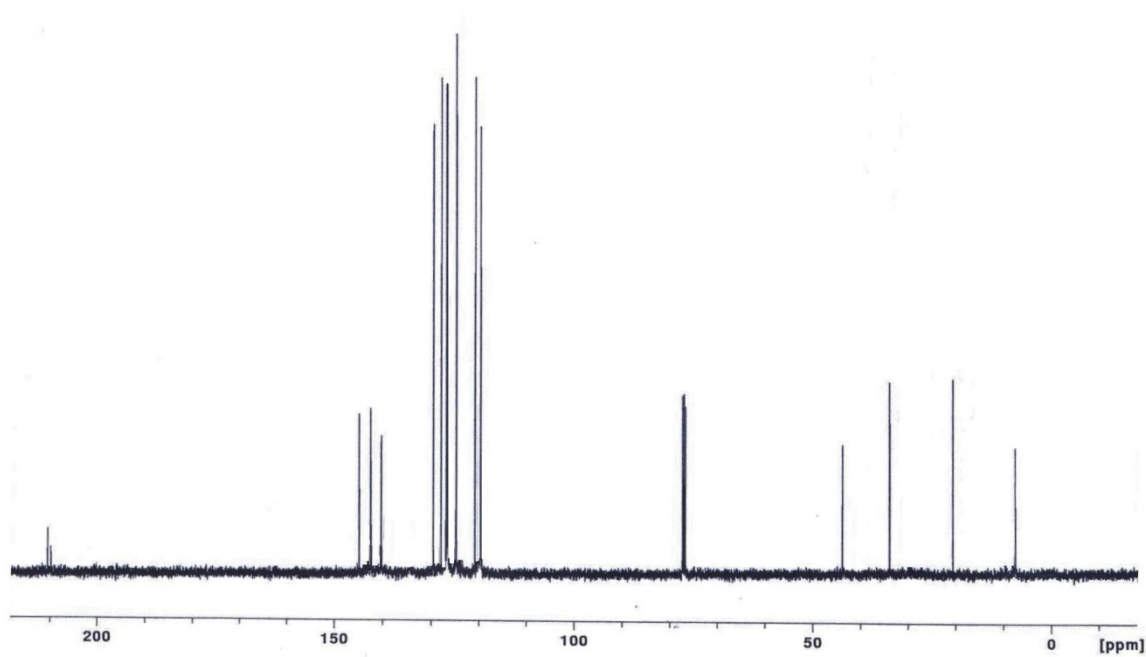

S18.  $^1\text{H}$  NMR and  $^{13}\text{C}$  NMR in  $\text{CDCl}_3$  of **7n**

# Supporting Information

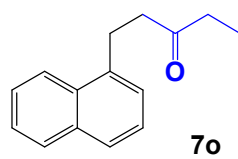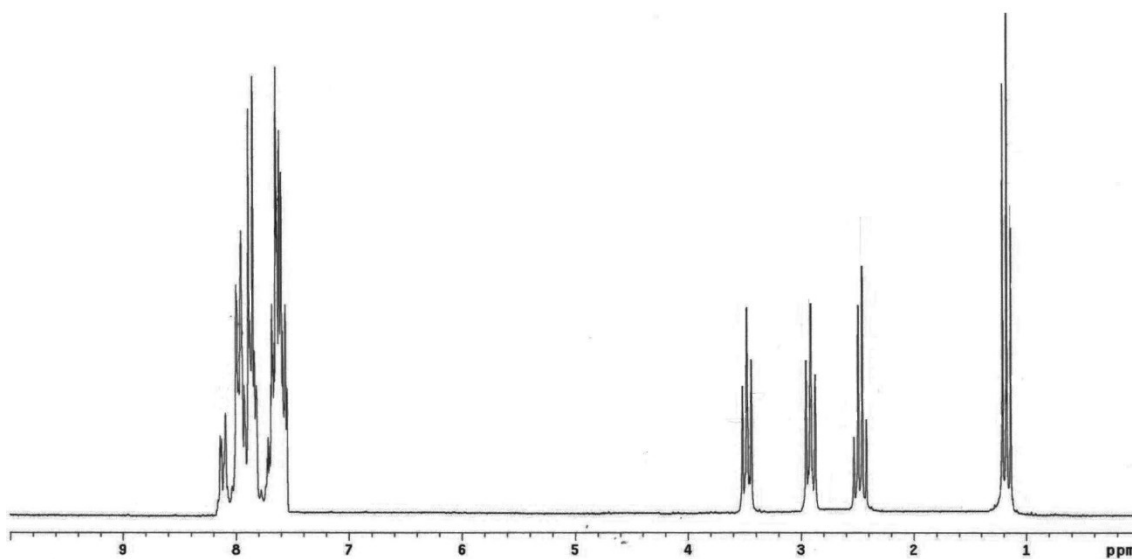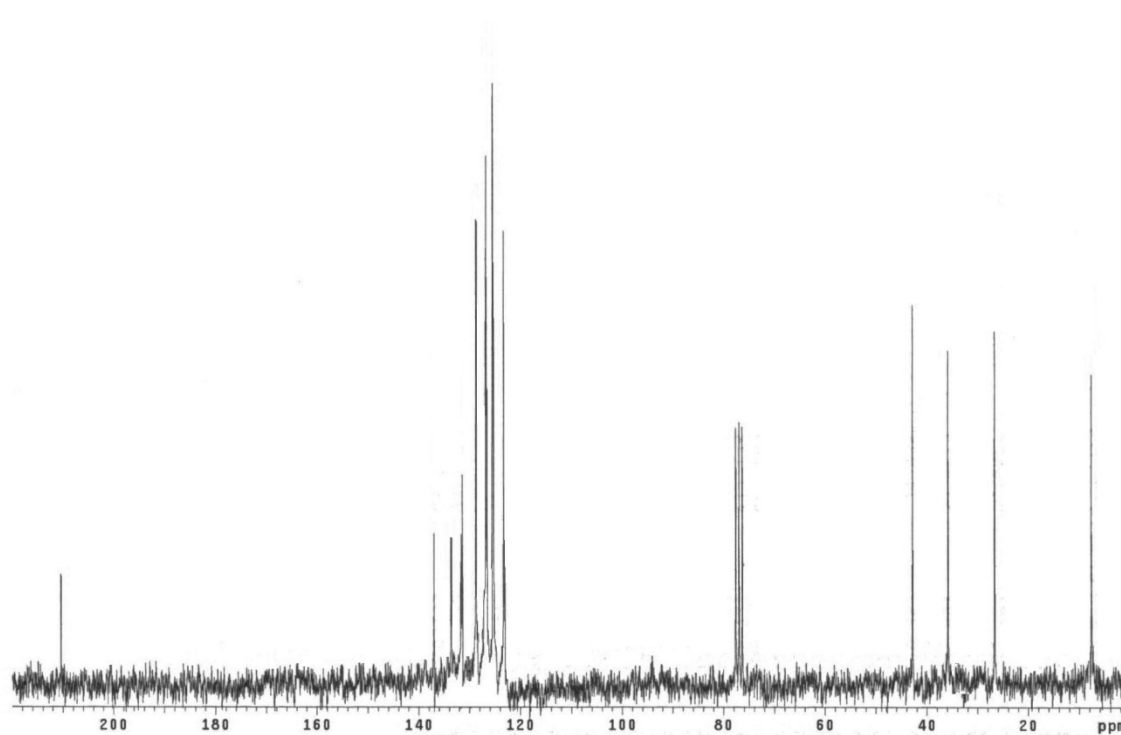

S19.  $^1\text{H}$  NMR and  $^{13}\text{C}$  NMR in  $\text{CDCl}_3$  of **7o**

# Supporting Information

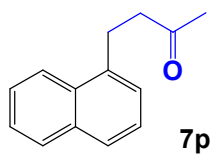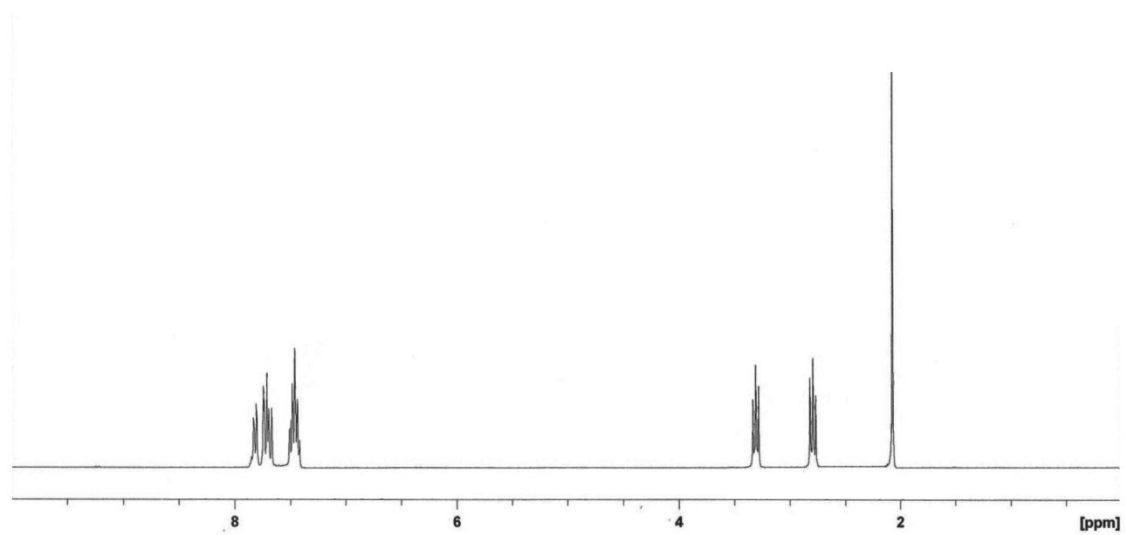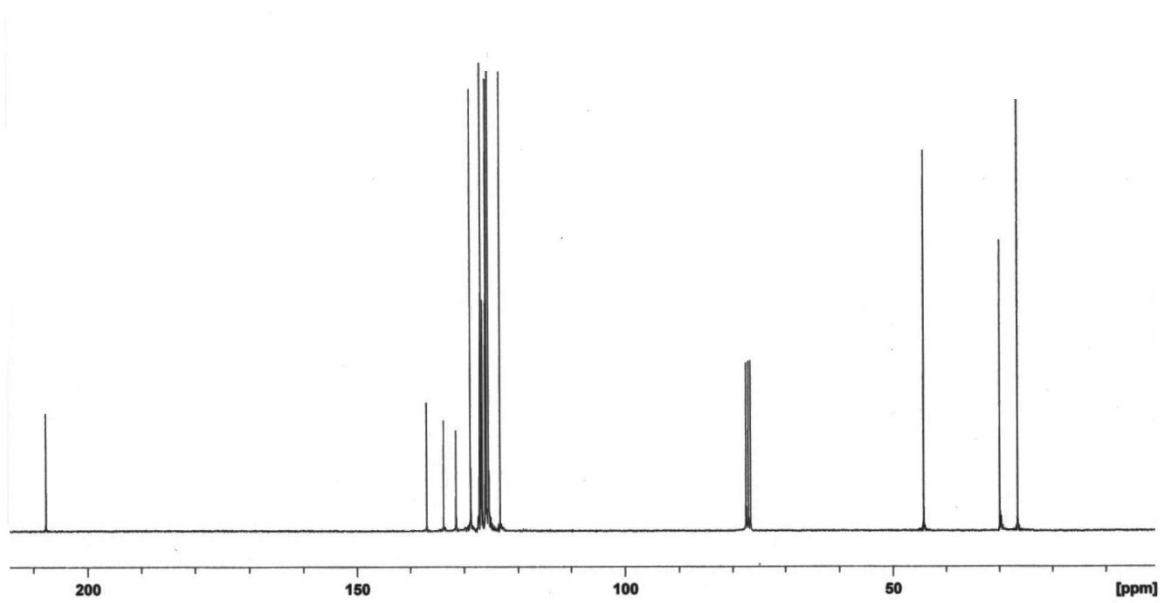

S20.  $^1\text{H}$  NMR and  $^{13}\text{C}$  NMR in  $\text{CDCl}_3$  of **7p**

# Supporting Information

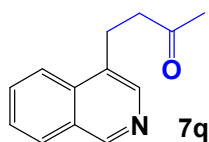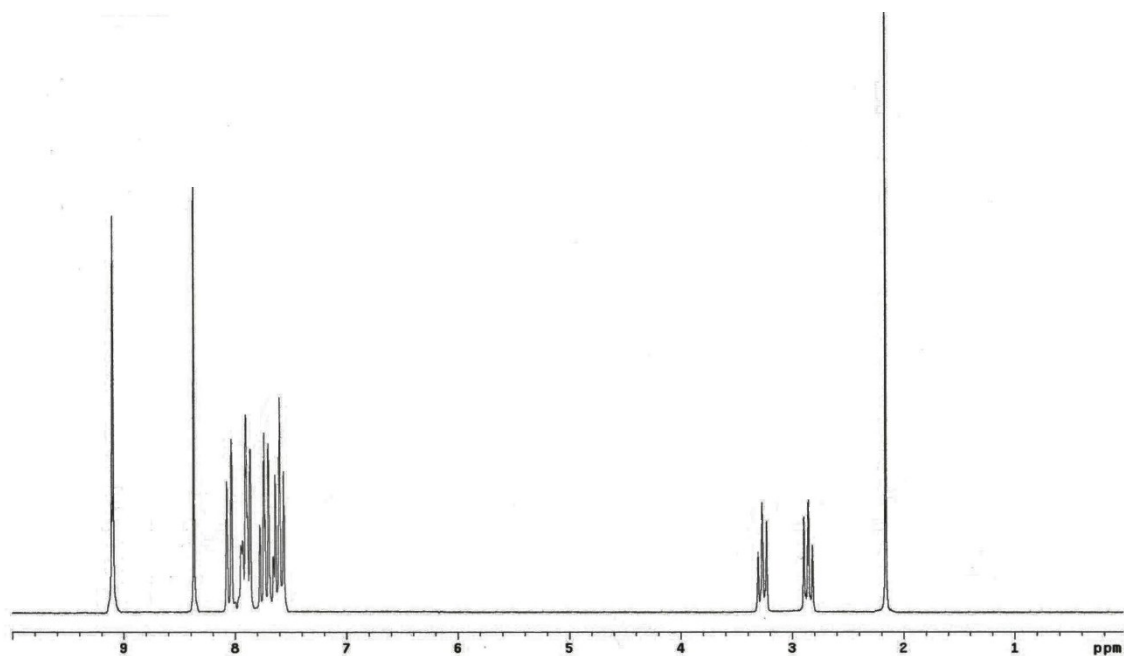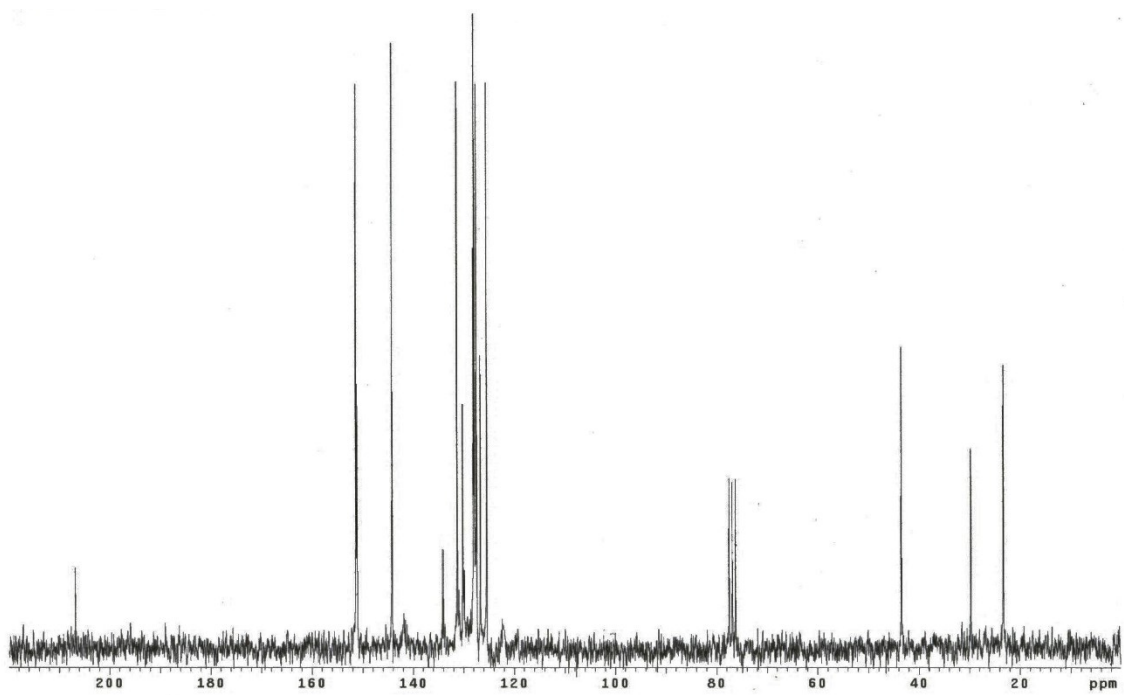

S21.  $^1\text{H}$  NMR and  $^{13}\text{C}$  NMR in  $\text{CDCl}_3$  of **7q**

## Supporting Information

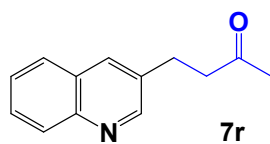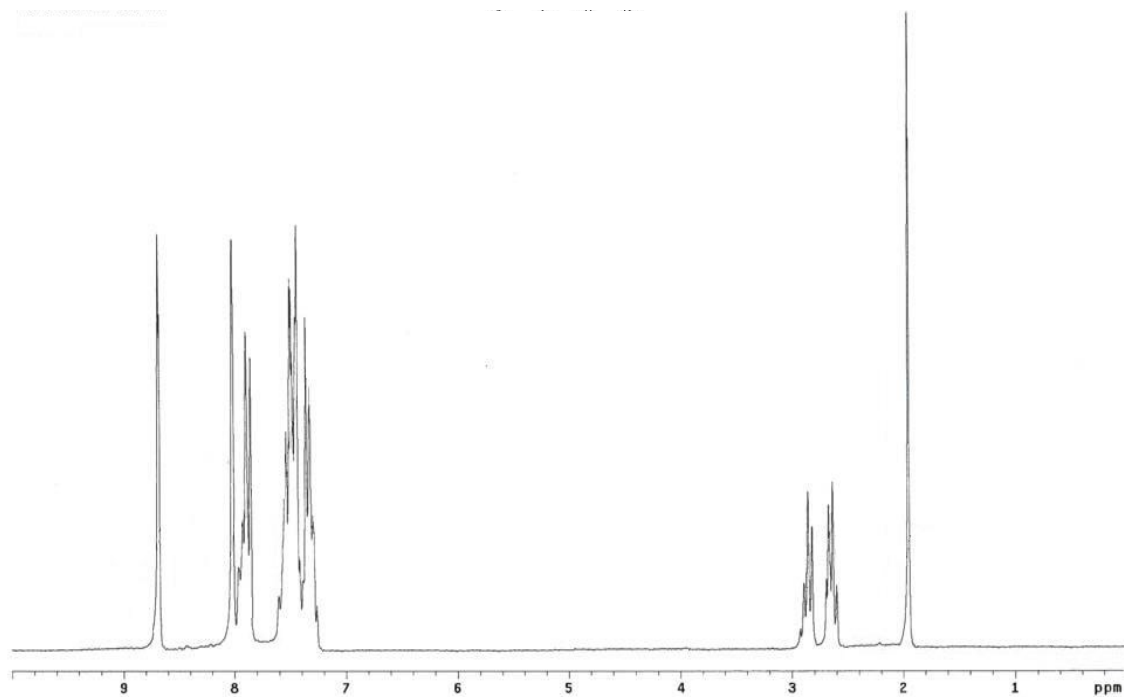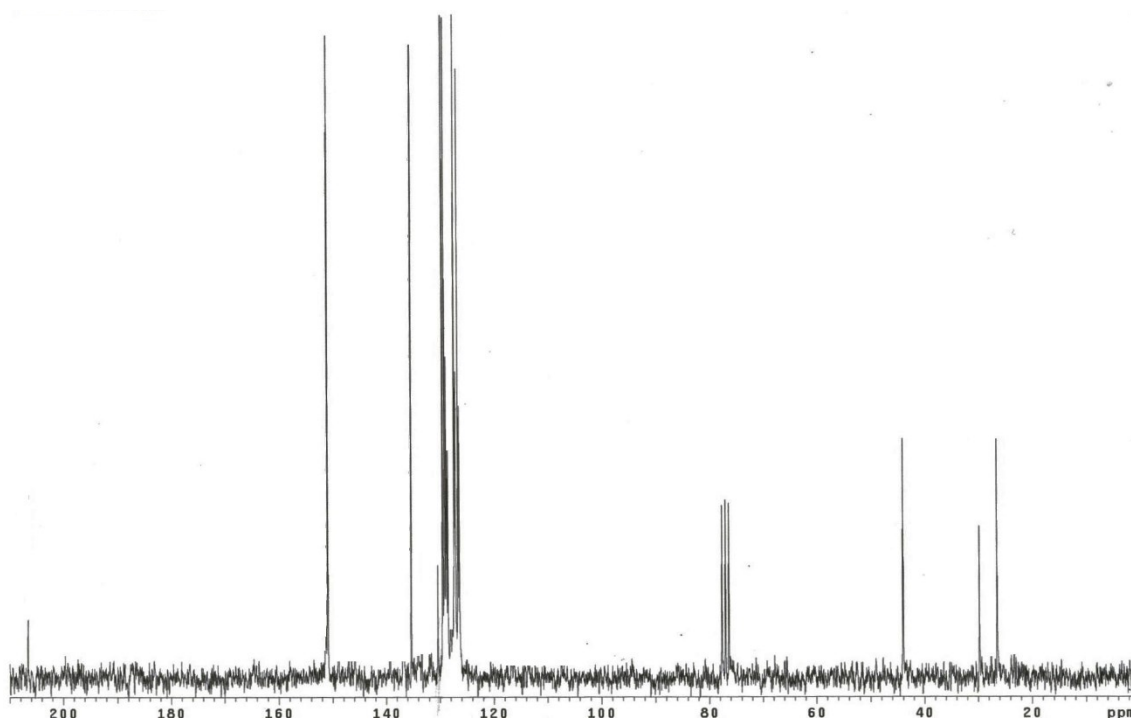

S22.  $^1\text{H}$  NMR and  $^{13}\text{C}$  NMR in  $\text{CDCl}_3$  of **7r**

## Supporting Information

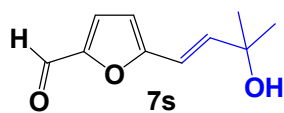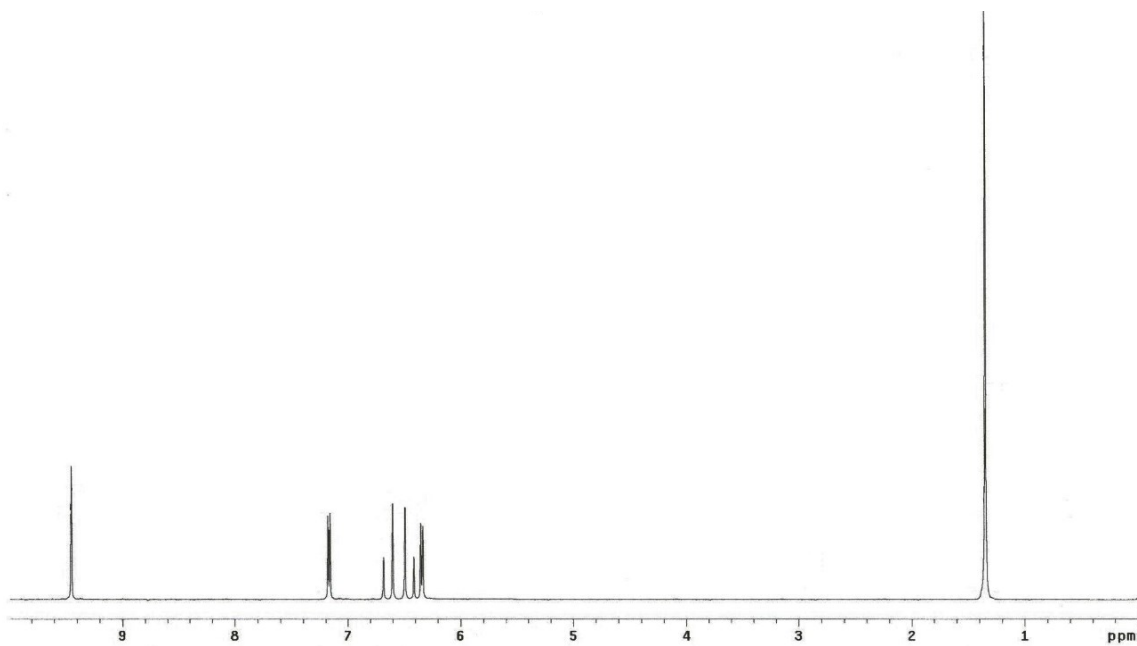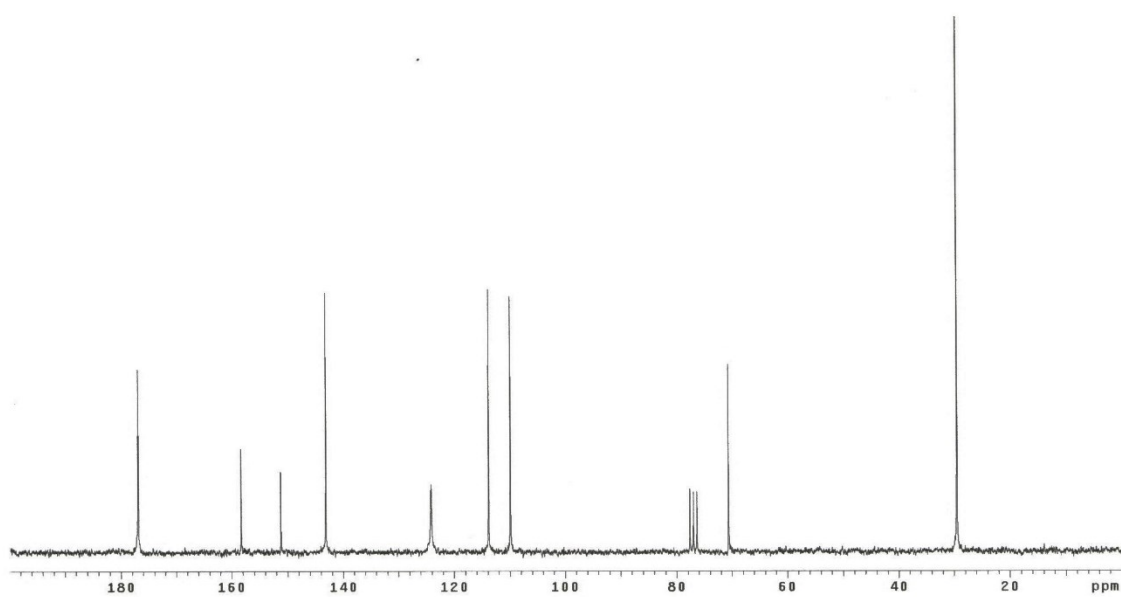

S23.  $^1\text{H}$  NMR and  $^{13}\text{C}$  NMR in  $\text{CDCl}_3$  of **76**



# Supporting Information

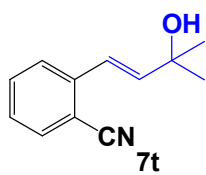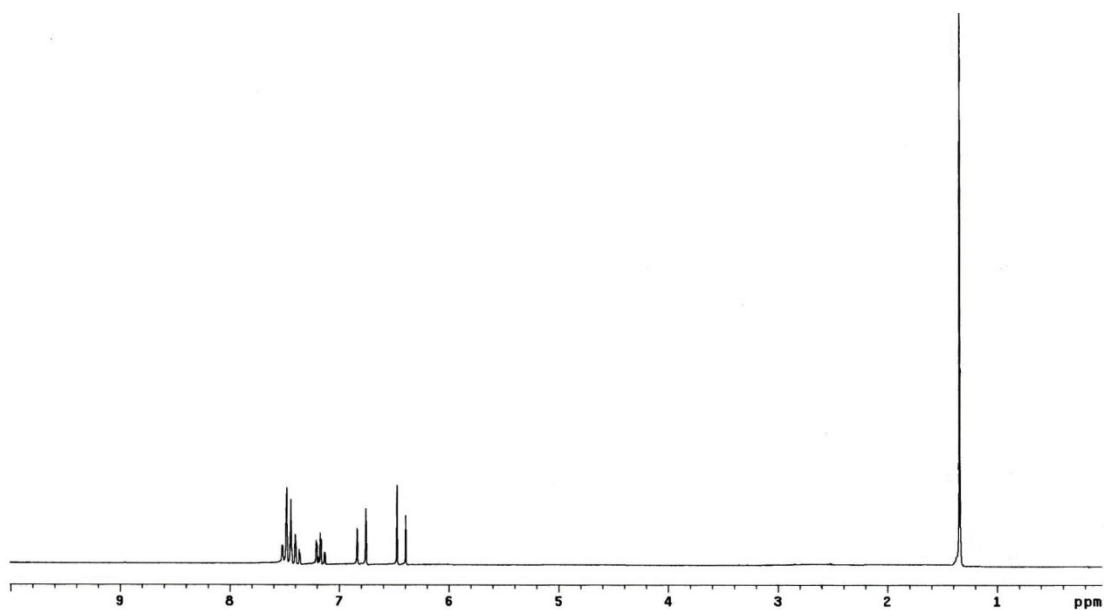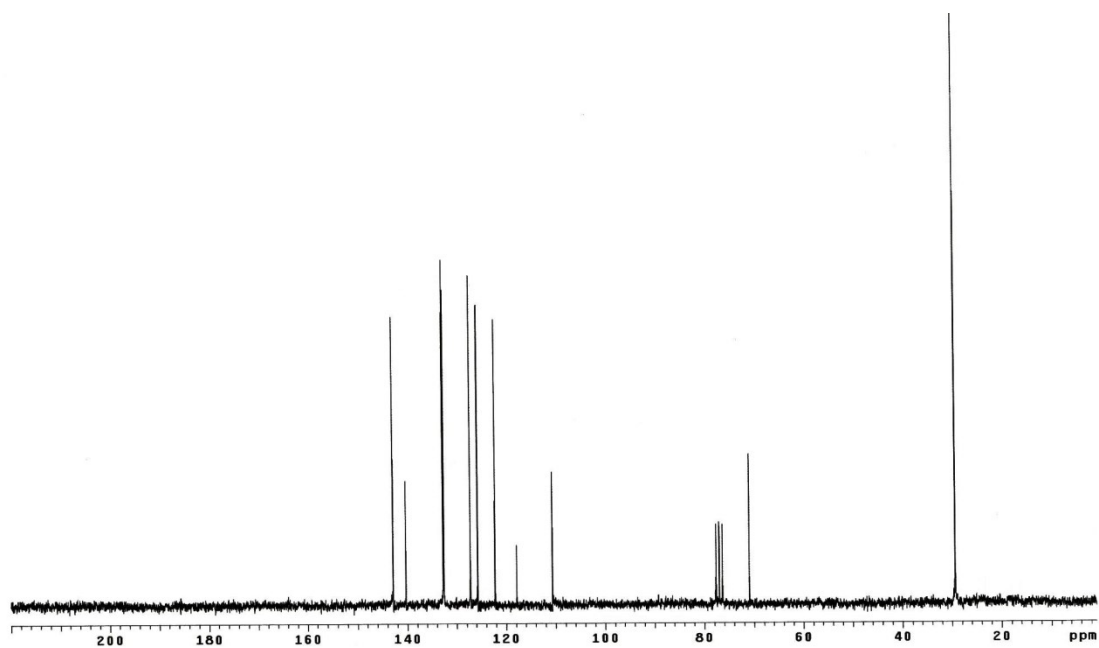

S24.  $^1\text{H}$  NMR and  $^{13}\text{C}$  NMR in  $\text{CDCl}_3$  of **7t**

# Supporting Information

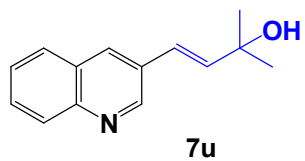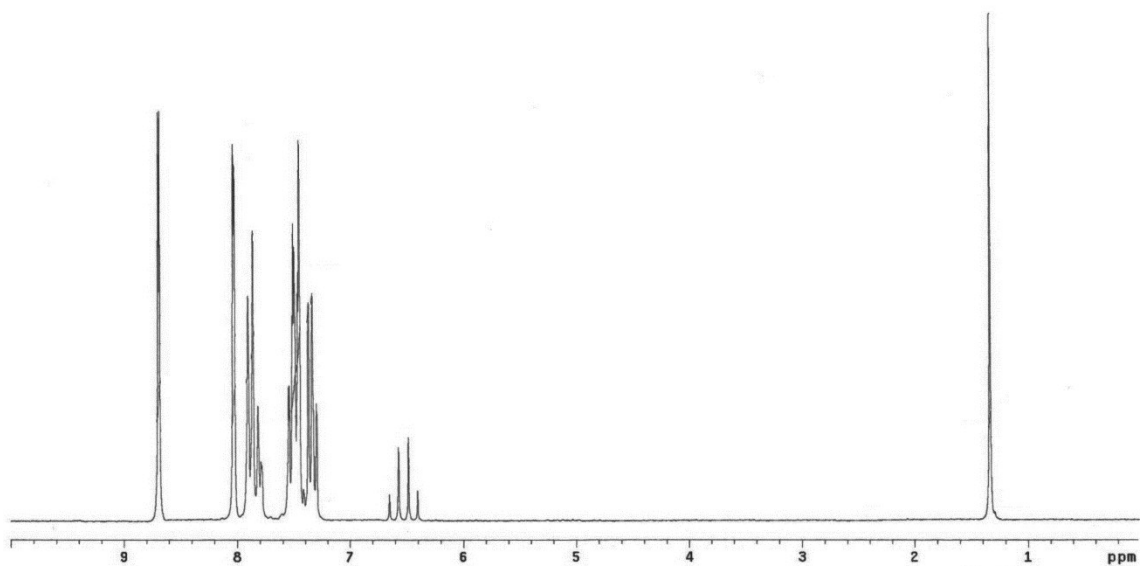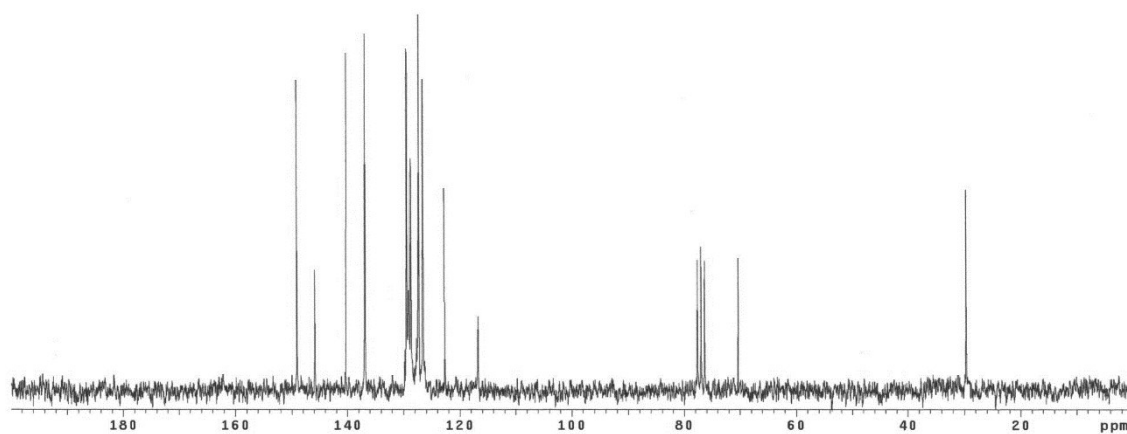

S25.  $^1\text{H}$  NMR and  $^{13}\text{C}$  NMR in  $\text{CDCl}_3$  of **7u**

# Supporting Information

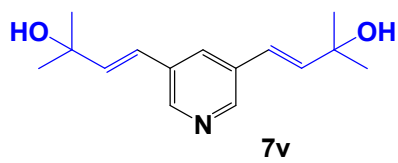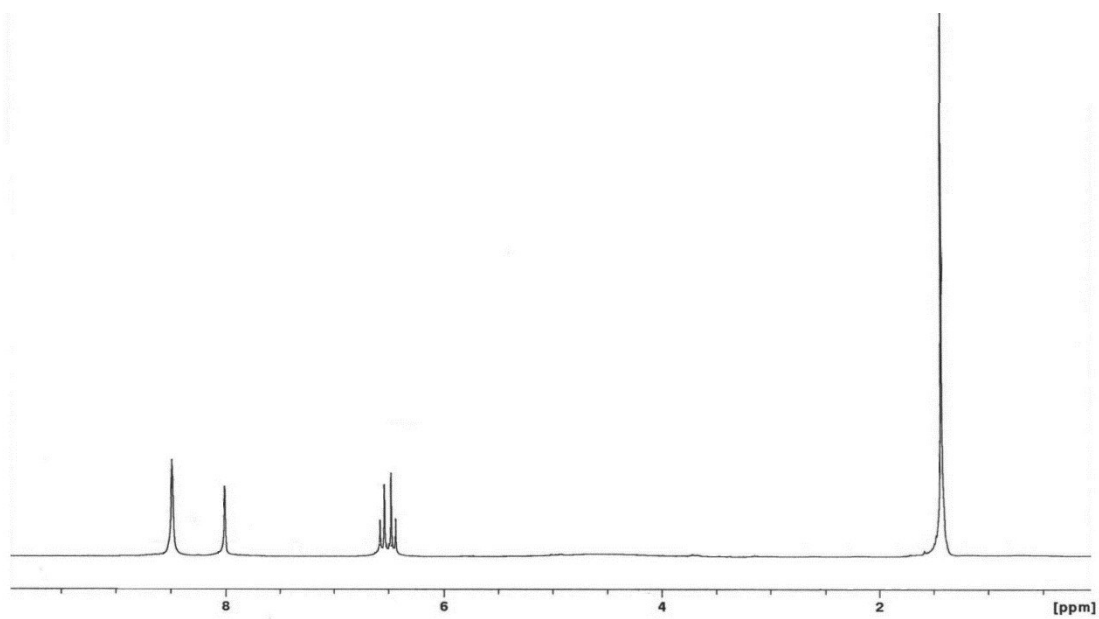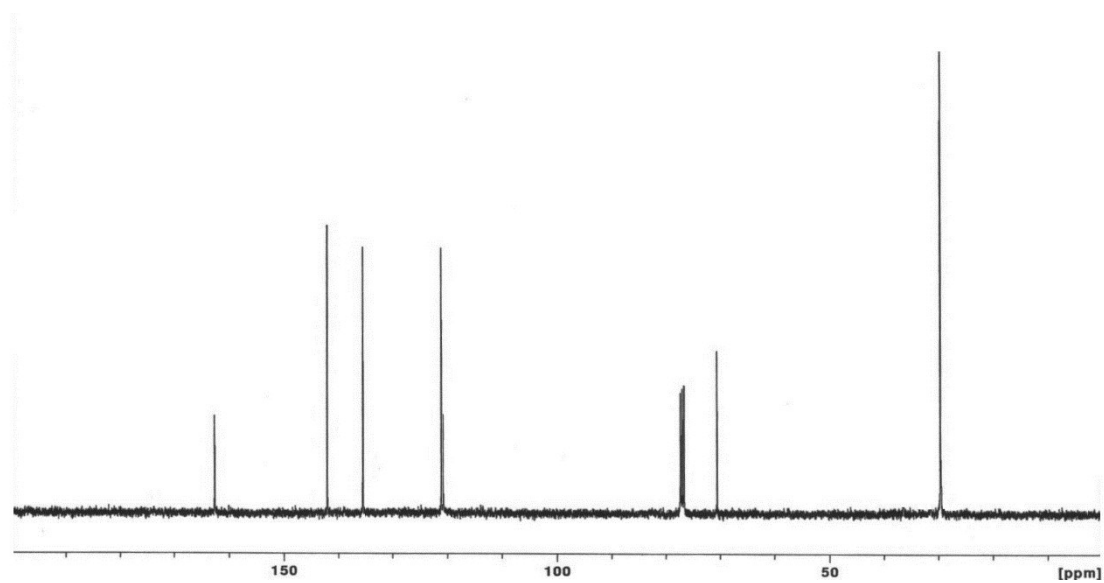

S26.  $^1\text{H}$  NMR and  $^{13}\text{C}$  NMR in  $\text{CDCl}_3$  of **7v**
